# Supplementary material for: CNTools: A computational toolbox for cellular neighborhood analysis from multiplexed images
Source: PubMed Central journal article supplement (PMC11355562; doi:10.1371/journal.pcbi.1012344), 2024-08-28
Supplement: pcbi.1012344.s002.pdf [file pcbi.1012344.s002.pdf]

# Supporting information

## Supporting tables

Table A: **Experimented hyperparameters and smoothing techniques for each CN identification method on the CRC dataset.** The selected ones are highlighted.

| Method      | Hyperparameter                                                                                          | Smoothing                 |
|-------------|---------------------------------------------------------------------------------------------------------|---------------------------|
| CC          | $m \in \{5, 8, \mathbf{10}, 15, 20\}$                                                                   | None, <b>Naive</b> , HMRF |
| CF-IDF      | $\varepsilon \in \{\mathbf{32}, 40, 50\}(d \in \{\mathbf{3}, 5, 8\}), r \in \{0.5, \mathbf{0.8}, 1.0\}$ | None, <b>Naive</b> , HMRF |
| CNE         | $perp \in \{5, 10, \mathbf{15}, 20, 25\}, \lambda = 0.25$                                               | None, <b>Naive</b> , HMRF |
| Spatial LDA | $\varepsilon \in \{\mathbf{50}, 75, 100\}, b \in \{\mathbf{0.025}, 0.25, 2.5\}$                         | None, <b>Naive</b> , HMRF |
| ClusterNet  | $k \in \{3, \mathbf{6}, 9, 12, 15\}$                                                                    | None, <b>Naive</b> , HMRF |
| GAP         | $k \in \{3, 6, 9, 12, 15\}$                                                                             | None, Naive, HMRF         |

Table B: **Experimented hyperparameters and smoothing techniques of CN identification methods on the T2D dataset.** The selected ones are highlighted.

| Method      | Hyperparameter                                                                                          | Smoothing                 |
|-------------|---------------------------------------------------------------------------------------------------------|---------------------------|
| CC          | $m \in \{\mathbf{5}, 8, 10, 15, 20\}$                                                                   | None, Naive, <b>HMRF</b>  |
| CF-IDF      | $\varepsilon \in \{35, 45, \mathbf{57}\}(d \in \{\mathbf{3}, 5, 8\}), r \in \{\mathbf{0.5}, 0.8, 1.0\}$ | None, <b>Naive</b> , HMRF |
| CNE         | $perp \in \{5, 10, \mathbf{15}, 20, 25\}, \lambda = 0.25$                                               | None, <b>Naive</b> , HMRF |
| Spatial LDA | $\varepsilon \in \{50, 75, \mathbf{100}\}, b \in \{0.025, \mathbf{0.25}, 2.5\}$                         | None, <b>Naive</b> , HMRF |
| ClusterNet  | $k \in \{\mathbf{3}, \mathbf{6}, 9, 12, 15\}$                                                           | None, Naive, <b>HMRF</b>  |
| GAP         | $k \in \{3, 6, 9, 12, 15\}$                                                                             | None, Naive, HMRF         |

Table C: **Experimented hyperparameters and smoothing techniques of CN identification methods on the HLT dataset.** The selected ones are highlighted.

| Method      | Hyperparameter                                                                                          | Smoothing                 |
|-------------|---------------------------------------------------------------------------------------------------------|---------------------------|
| CC          | $m \in \{10, 15, \mathbf{20}, 25, 30\}$                                                                 | None, <b>Naive</b> , HMRF |
| CF-IDF      | $\varepsilon \in \{\mathbf{23}, 29, 36\}(d \in \{\mathbf{3}, 5, 8\}), r \in \{0.5, \mathbf{0.8}, 1.0\}$ | None, <b>Naive</b> , HMRF |
| CNE         | $perp \in \{5, 10, \mathbf{15}, 20, 25\}, \lambda = 0.25$                                               | None, <b>Naive</b> , HMRF |
| Spatial LDA | $\varepsilon \in \{50, 75, 100\}, b \in \{0.025, 0.25, 2.5\}$                                           | -                         |
| ClusterNet  | $k \in \{3, 6, 9, 12, 15\}$                                                                             | -                         |
| GAP         | $k \in \{3, 6, 9, 12, 15\}$                                                                             | -                         |

# Supporting figures for the CRC dataset

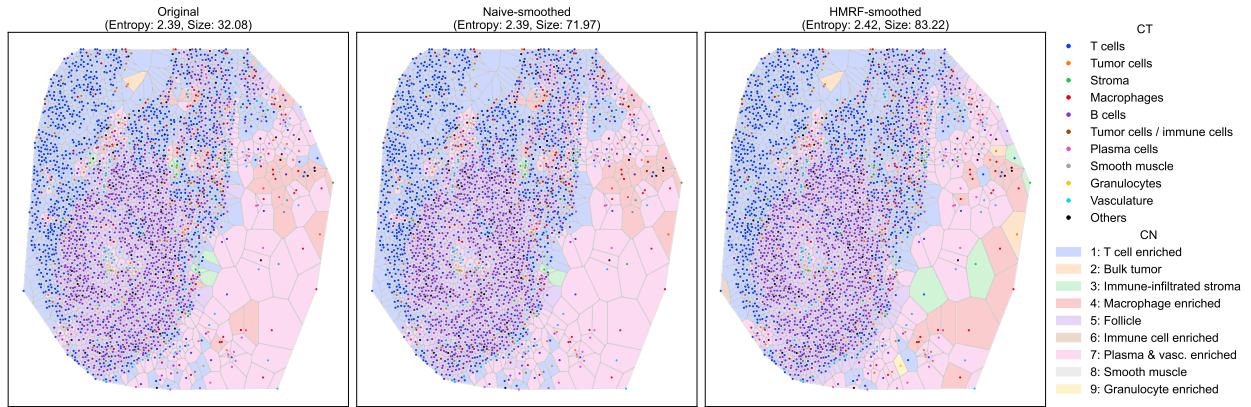

(a) CC

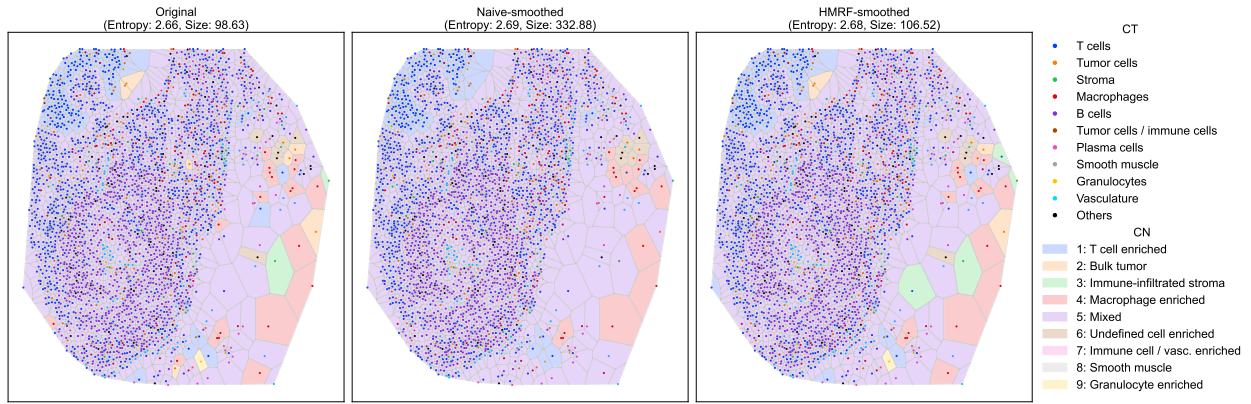

(b) CF-IDF

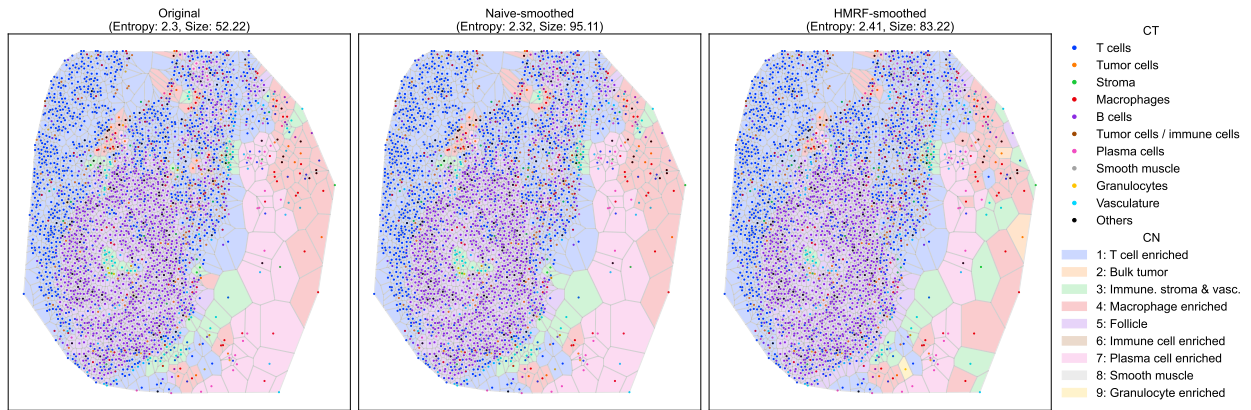

(c) CNE



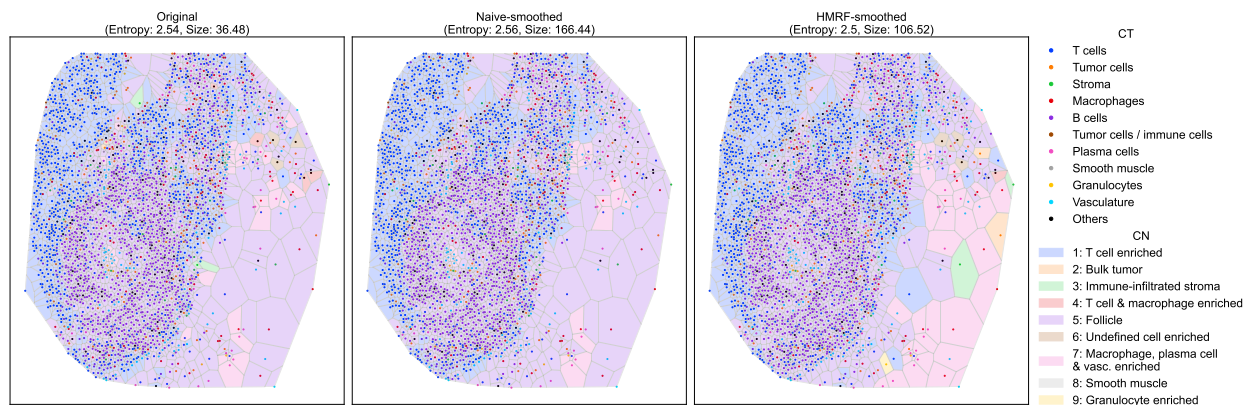

(d) Spatial LDA

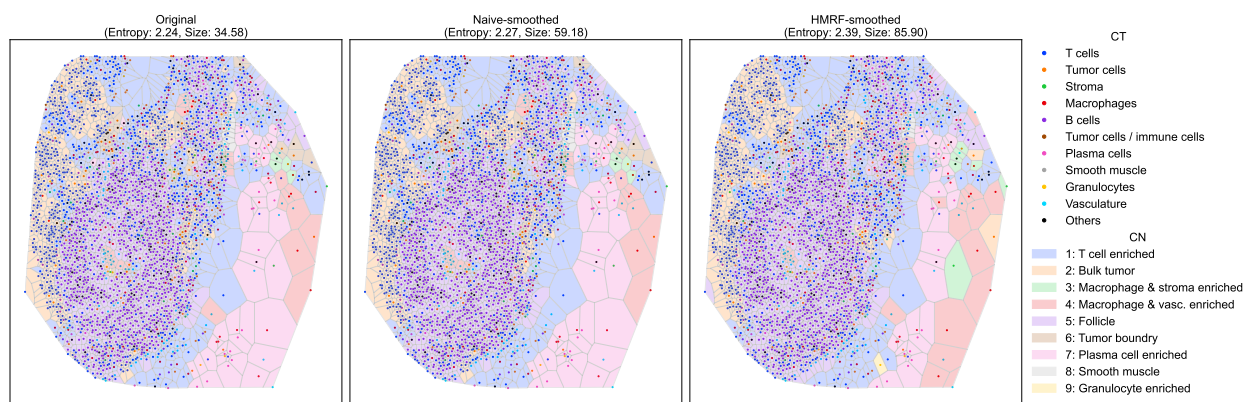

(e) ClusterNet

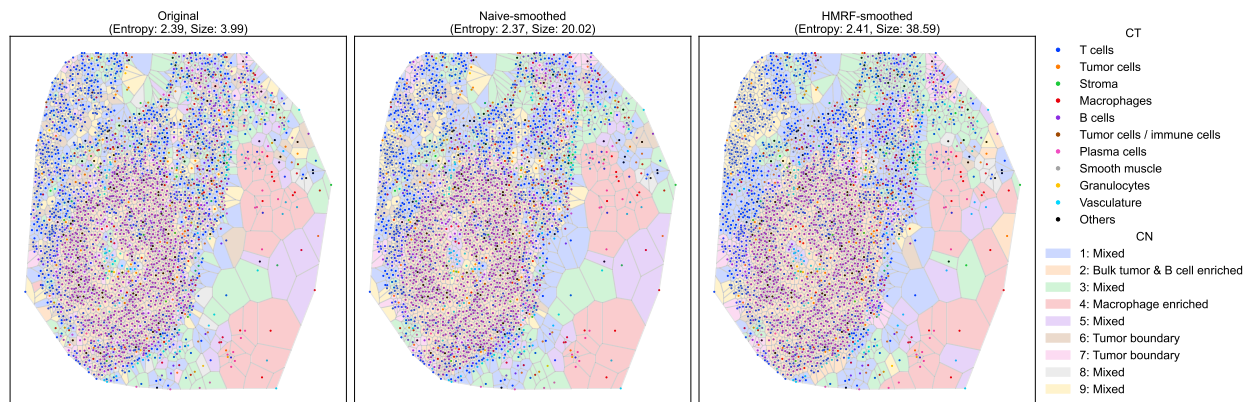

(f) GAP

Figure A: Voronoi diagrams showing the identified CNs of different methods on image reg021\_A of the CRC dataset. For GAP, we used  $k=6$  and Naive smoothing for illustration.

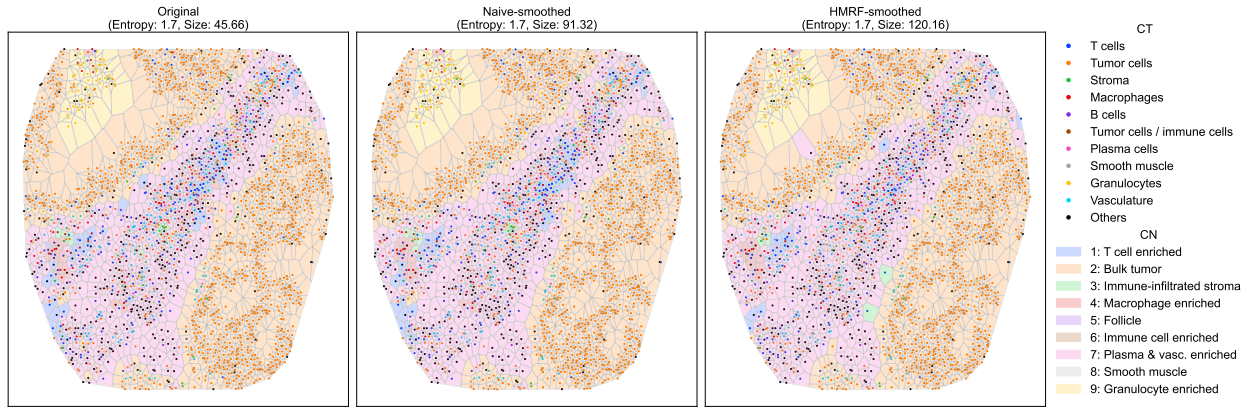

(a) CC

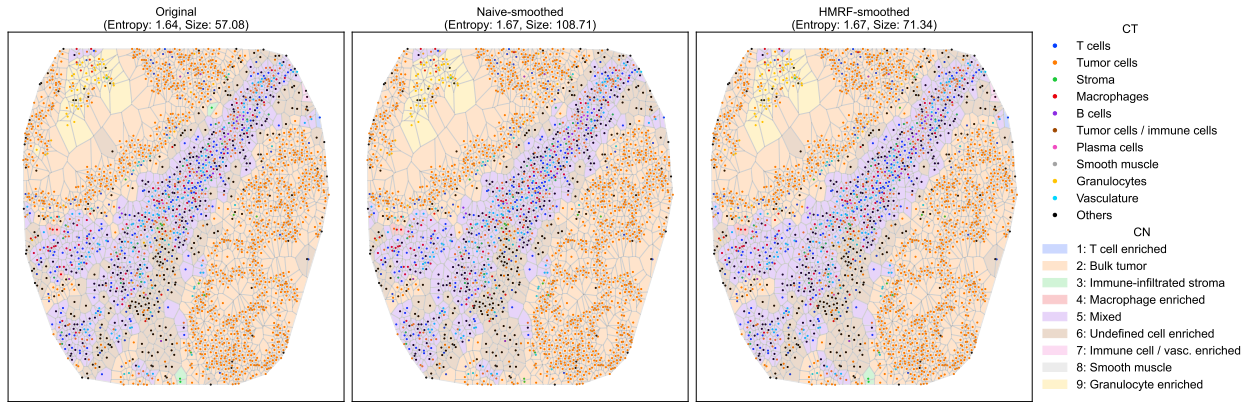

(b) CF-IDF

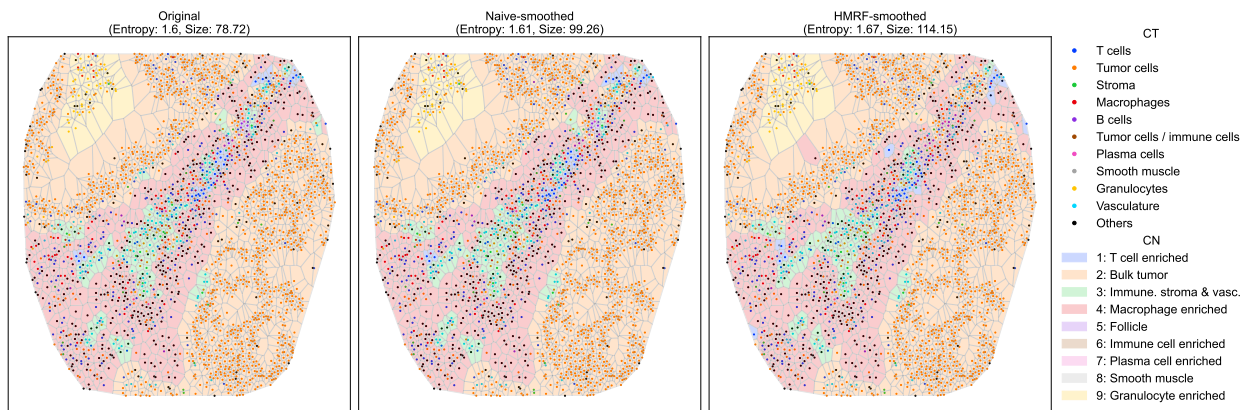

(c) CNE



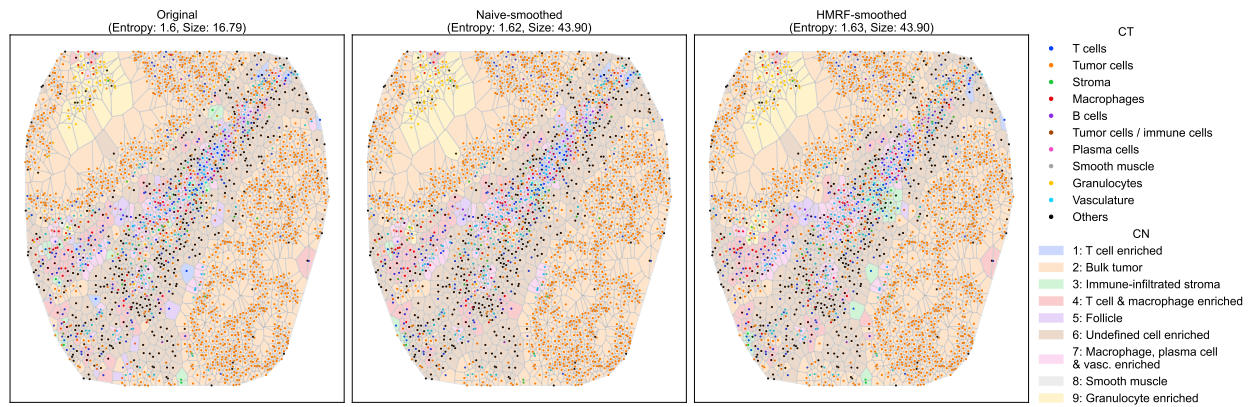

(d) Spatial LDA

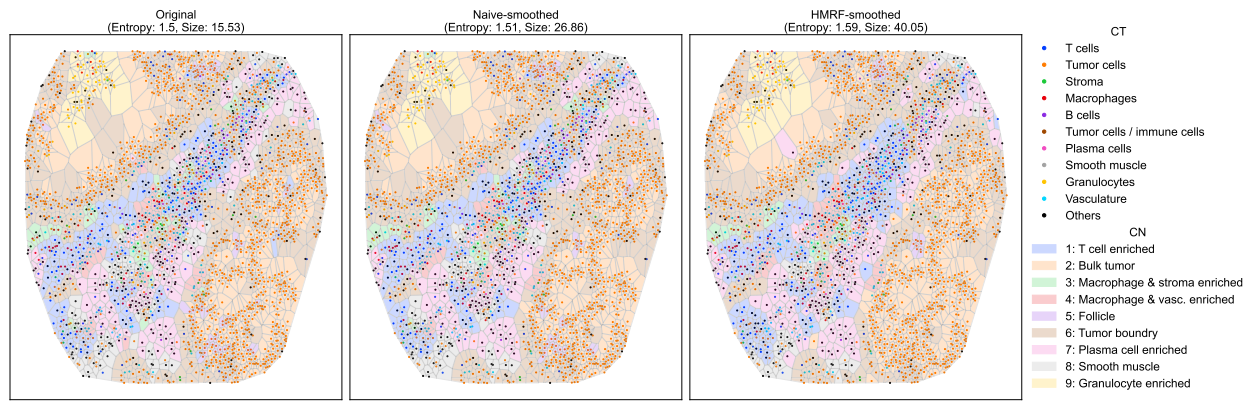

(e) ClusterNet

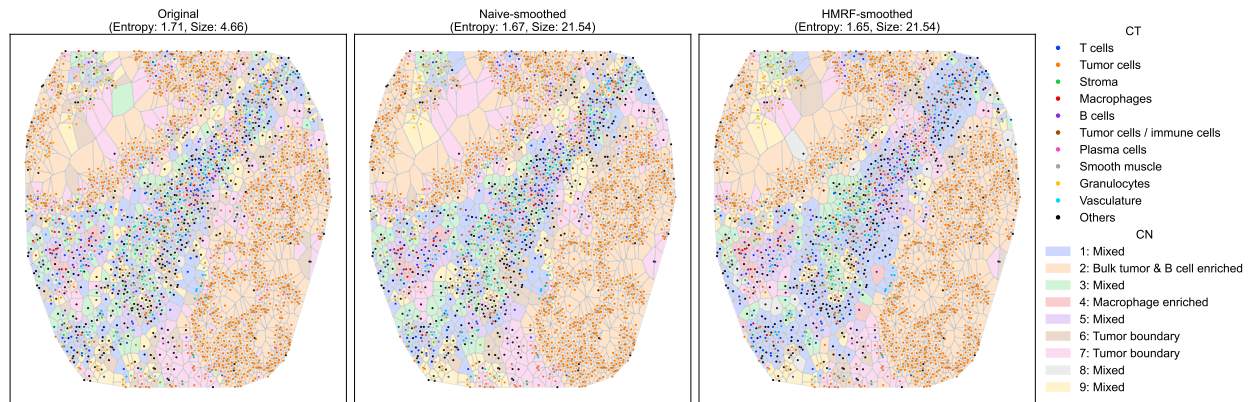

(f) GAP

Figure B: Voronoi diagrams showing the identified CNs of different methods on image reg065\_A of the CRC dataset. For GAP, we used  $k=6$  and Naive smoothing for illustration.

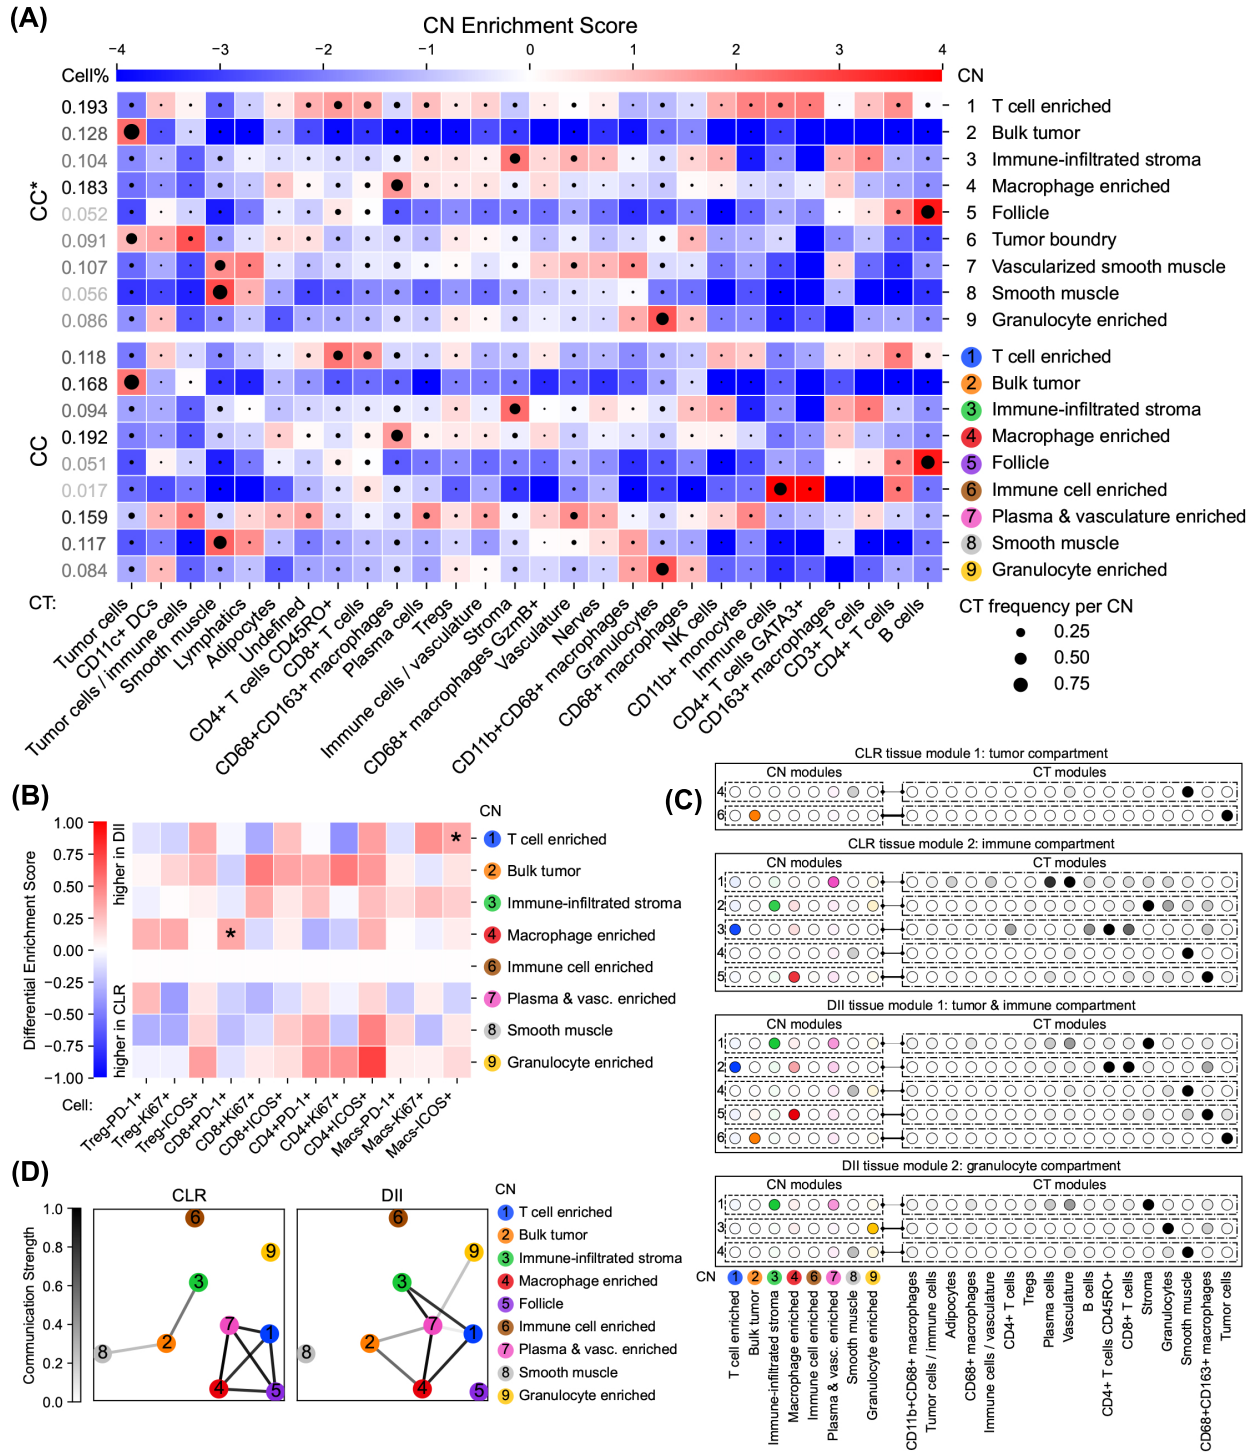

Figure C: CN analysis results of CC on the CRC dataset. (A) CT Enrichment analysis. (B) Differential CT Enrichment analysis. (C) Tensor Decomposition analysis. (D) Inter-CN Communication Network analysis involving {PD1+, Ki-67+, ICOS+}CD8+ T cells and Ki-67+ Tregs.



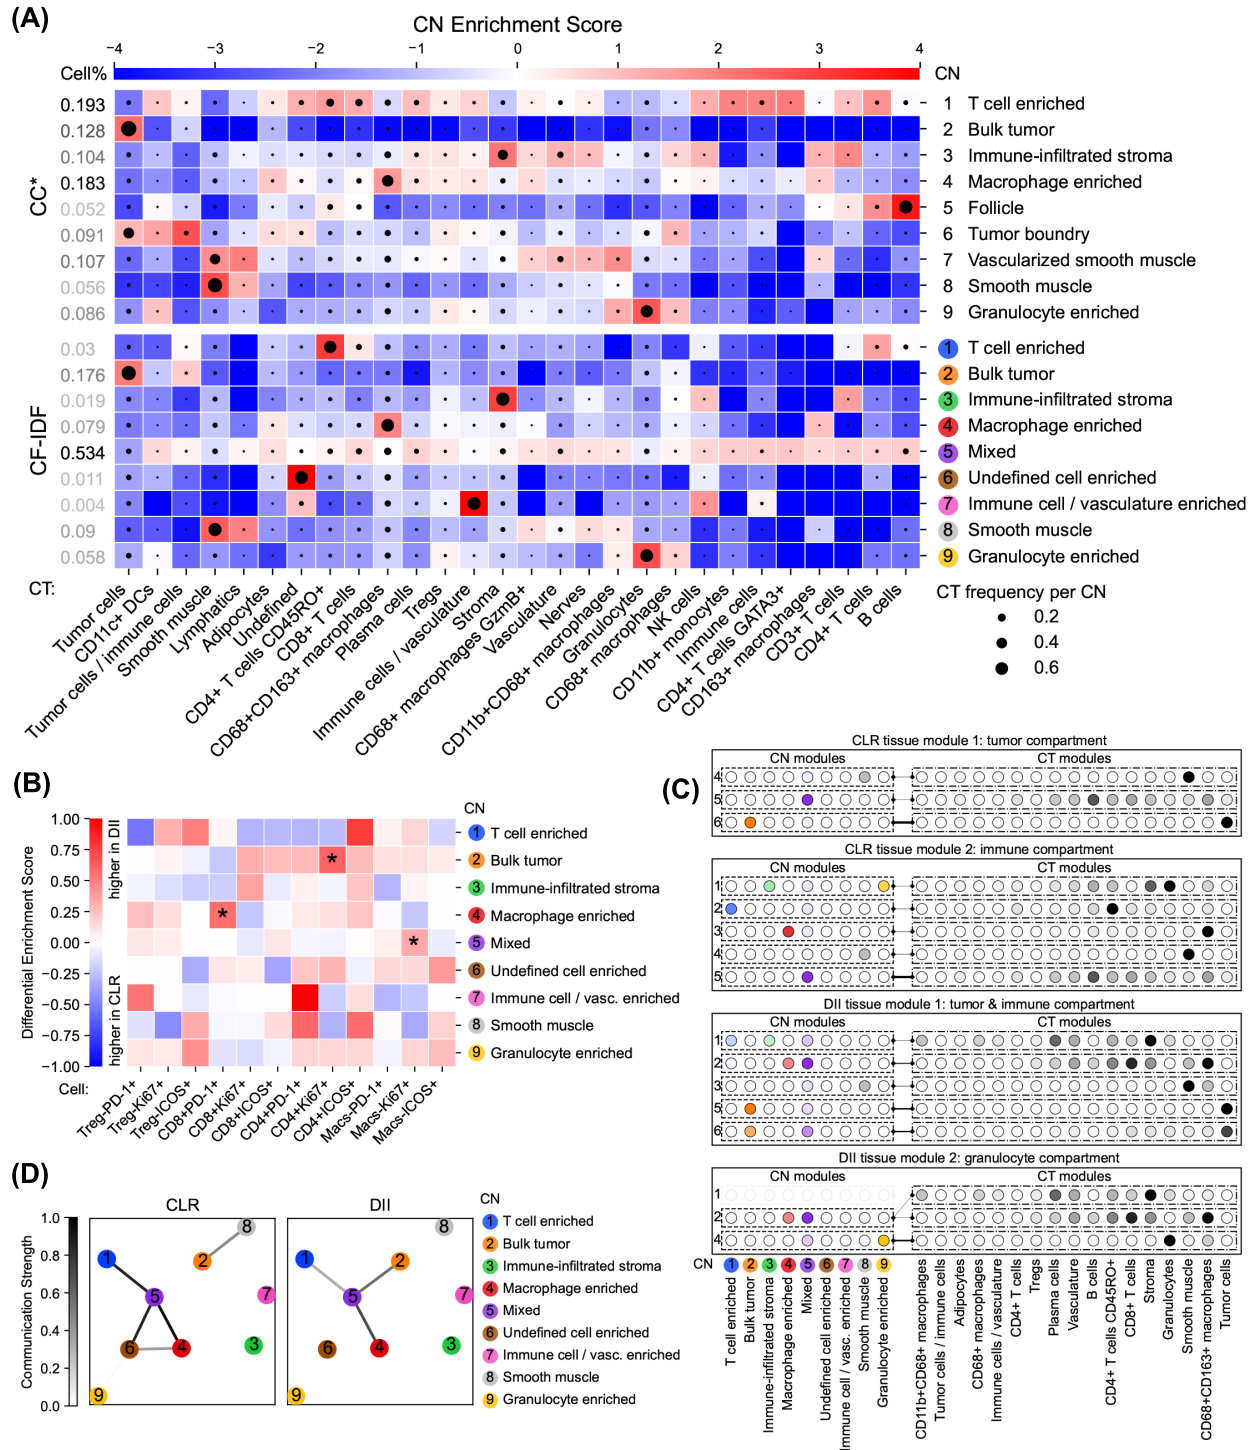

Figure D: CN analysis results of CF-IDF on the CRC dataset. (A) CT Enrichment analysis. (B) Differential CT Enrichment analysis. (C) Tensor Decomposition analysis. (D) Inter-CN Communication Network analysis involving {PD1+, Ki-67+, ICOS+}CD8+ T cells and Ki-67+ Tregs.

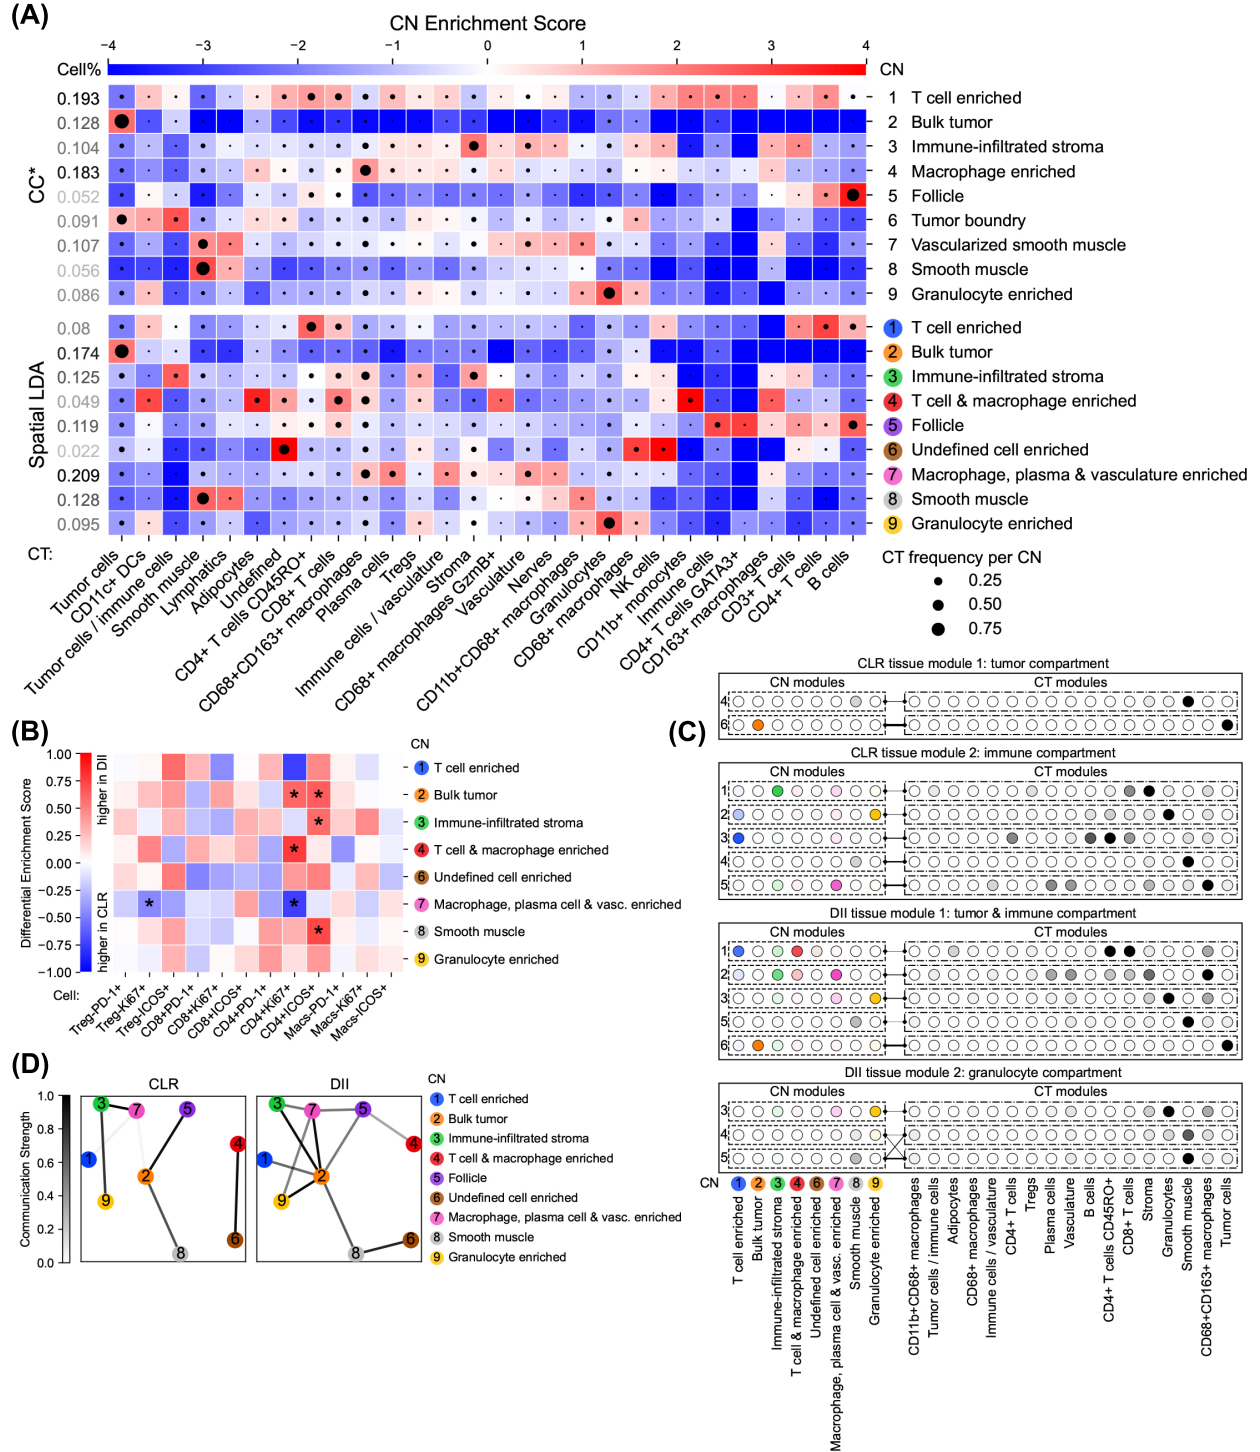

Figure E: CN analysis results of Spatial LDA on the CRC dataset. (A) CT Enrichment analysis. (B) Differential CT Enrichment analysis. (C) Tensor Decomposition analysis. (D) Inter-CN Communication Network analysis involving {PD1+, Ki-67+, ICOS+}CD8+ T cells and Ki-67+ Tregs.

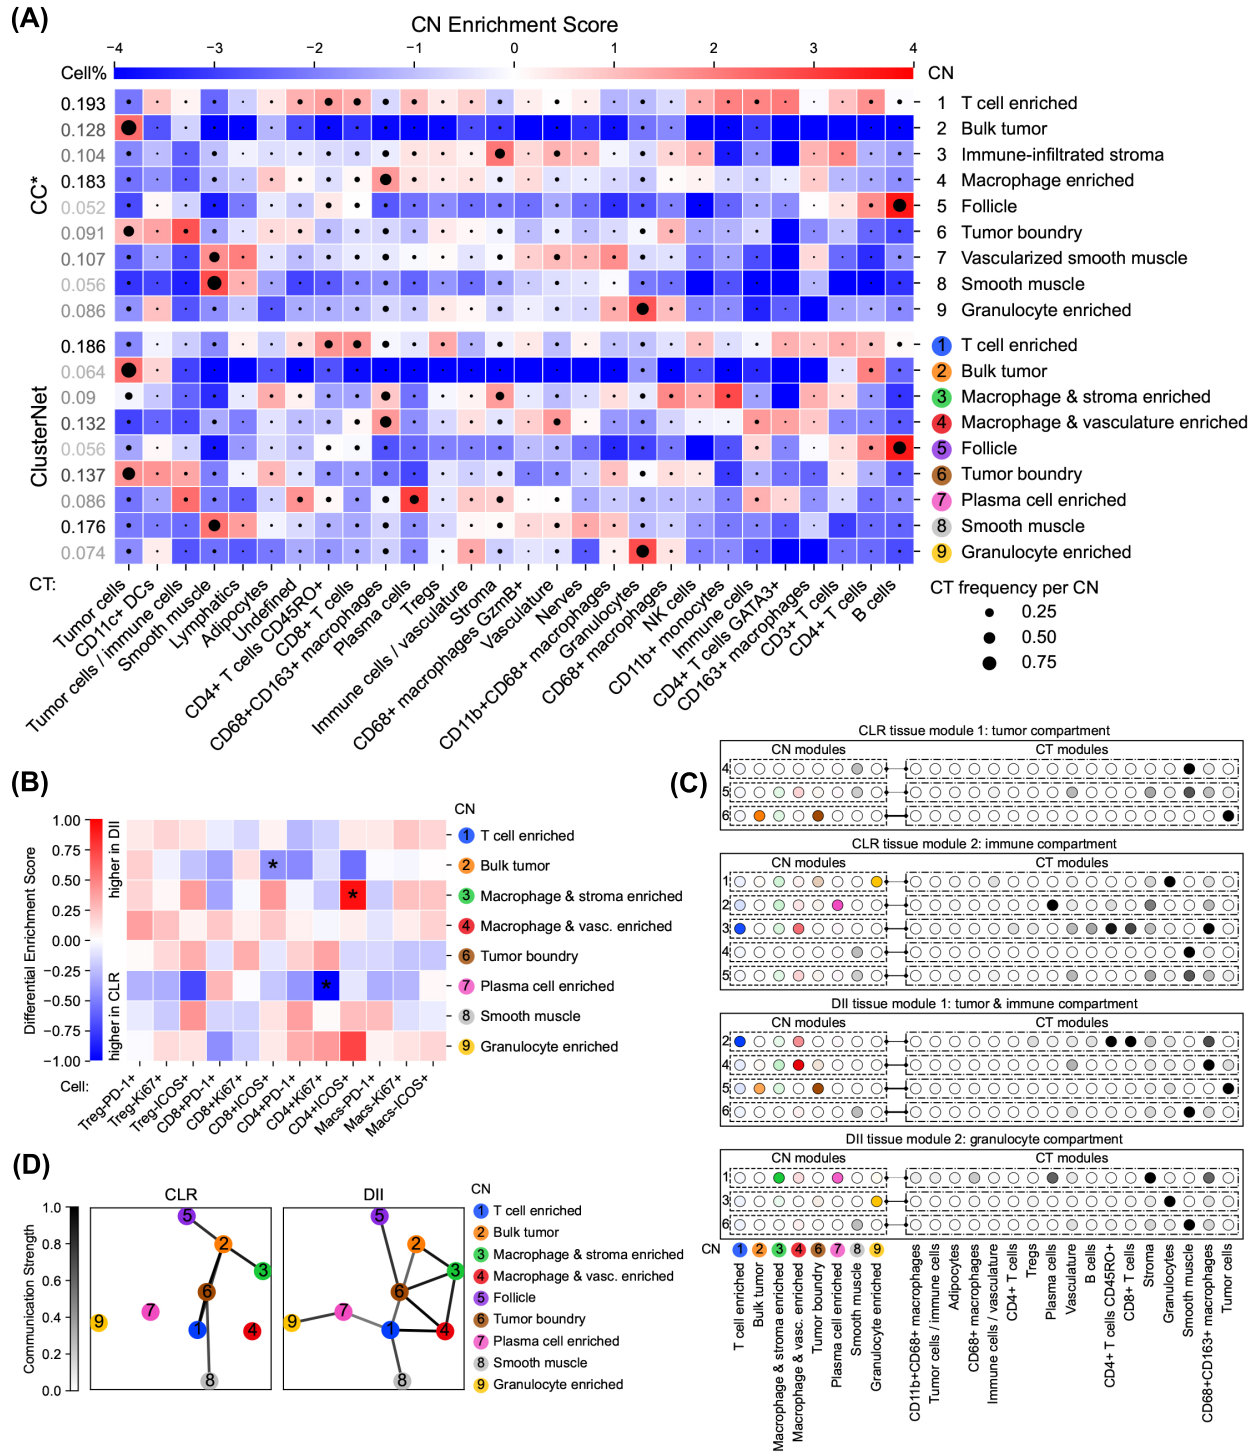

Figure F: CN analysis results of ClusterNet on the CRC dataset. (A) CT Enrichment analysis. (B) Differential CT Enrichment analysis. (C) Tensor Decomposition analysis. (D) Inter-CN Communication Network analysis involving {PD1+, Ki-67+, ICOS+}CD8+ T cells and Ki-67+ Tregs.

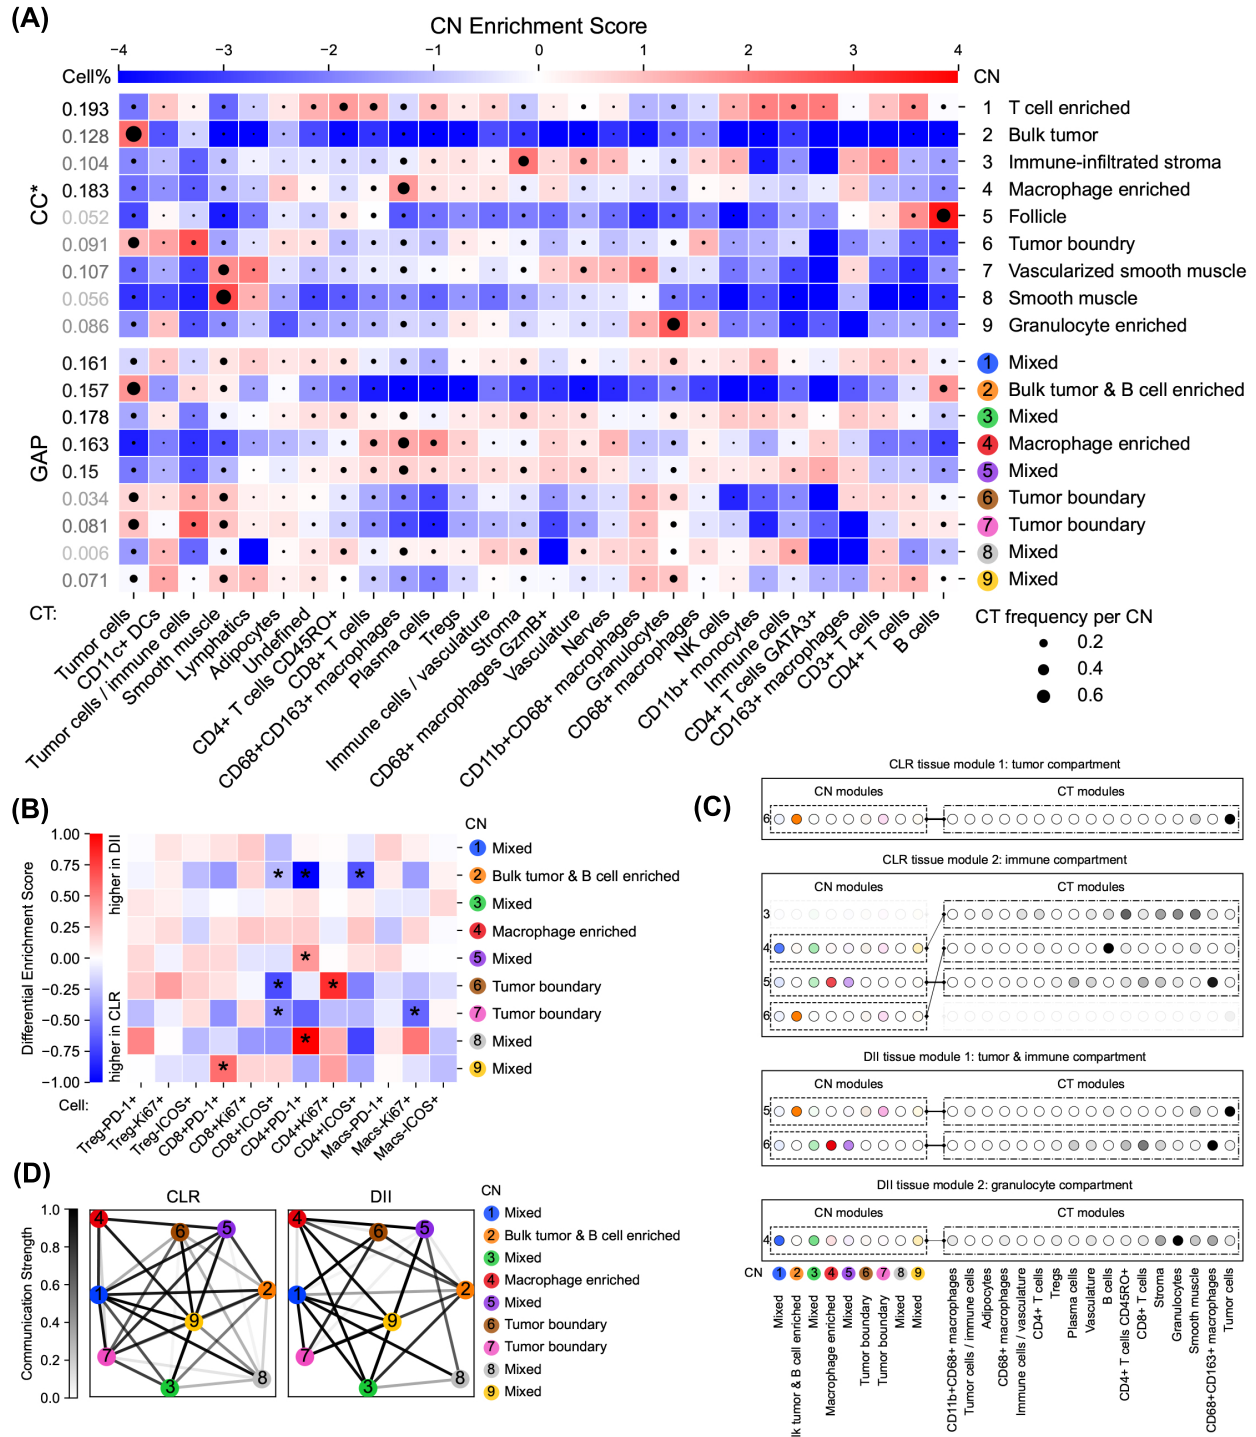

Figure G: CN analysis results of GAP on the CRC dataset. (A) CT Enrichment analysis. (B) Differential CT Enrichment analysis. (C) Tensor Decomposition analysis. (D) Inter-CN Communication Network analysis involving {PD1+, Ki-67+, ICOS+}CD8+ T cells and Ki-67+ Tregs.



# Supporting figures for the T2D dataset

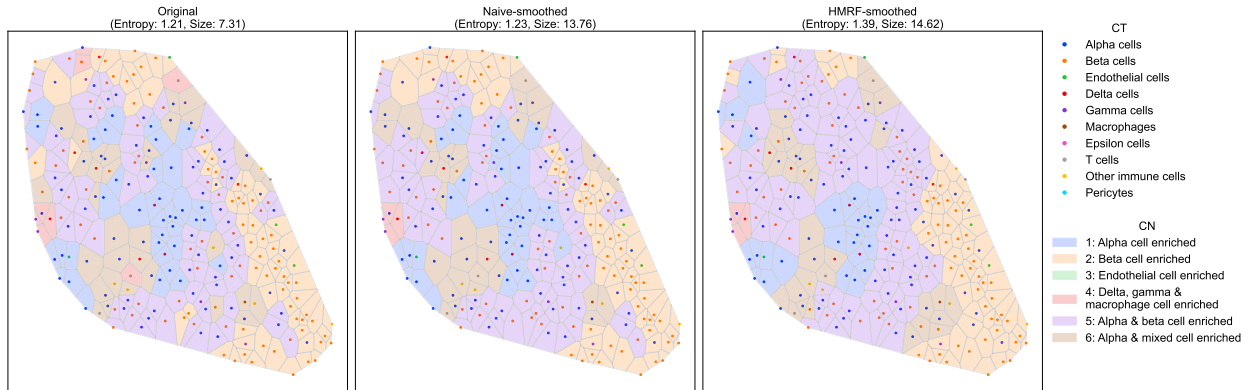

(a) CC

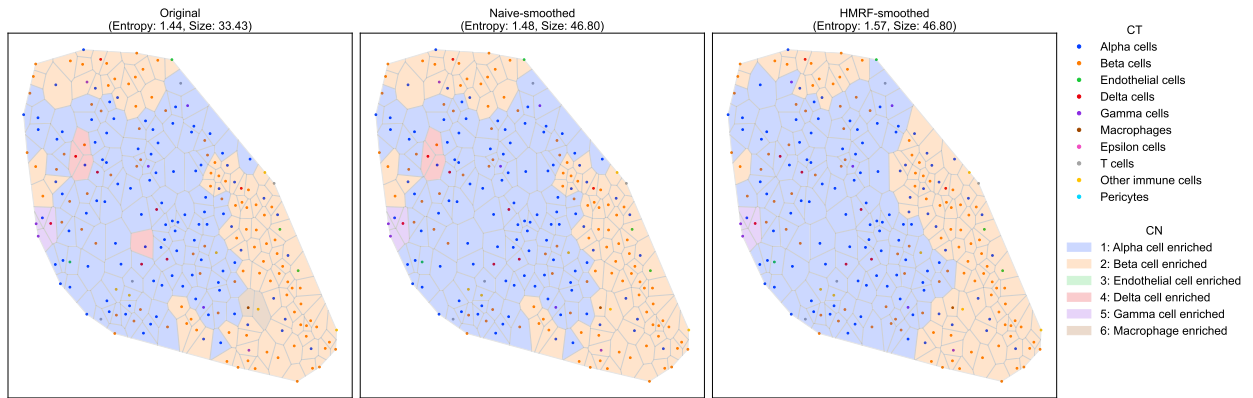

(b) CNE

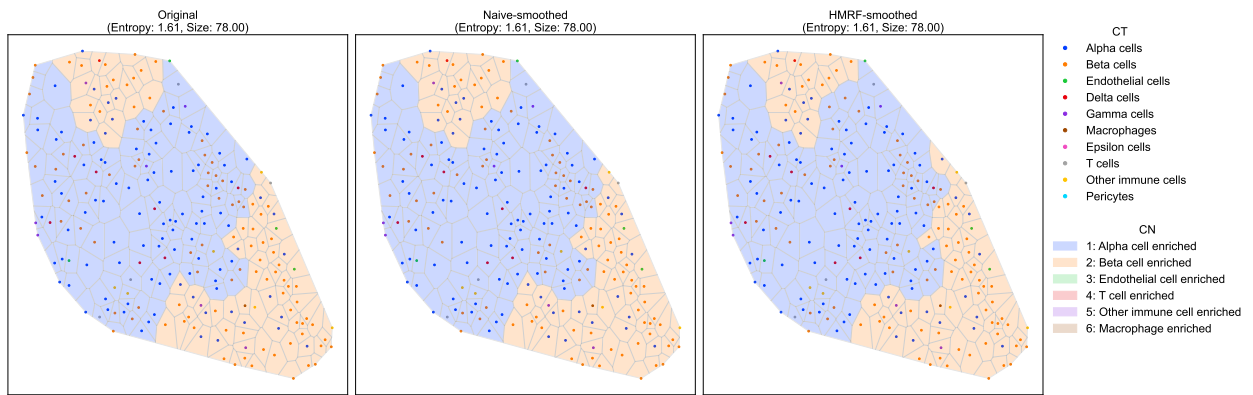

(c) CF-IDF

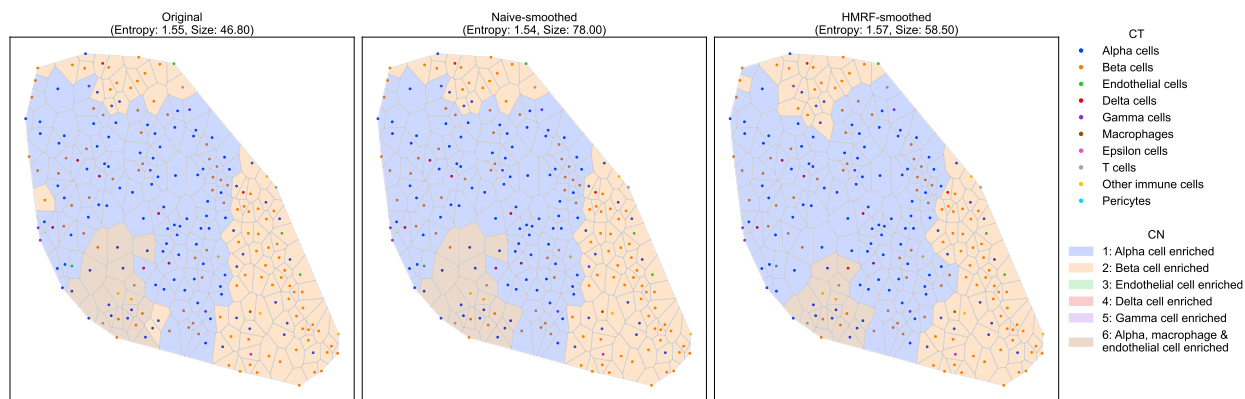

(d) Spatial LDA

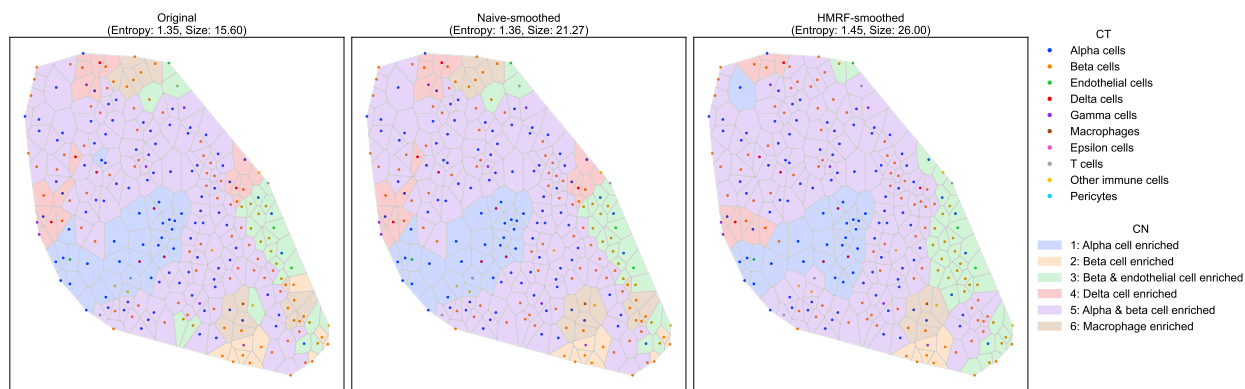

(e) ClusterNet

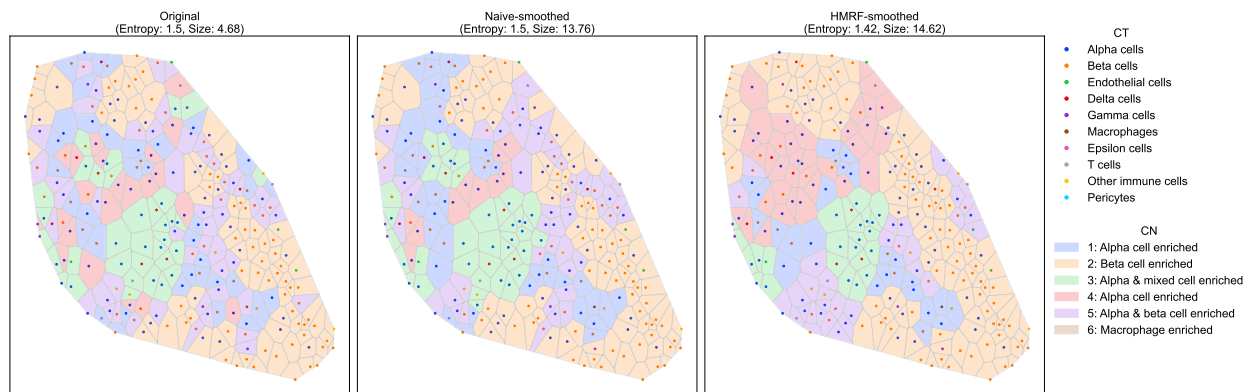

(f) GAP

Figure H: Voronoi diagrams showing the identified CNs of different methods on image ABHQ115.2 of the T2D dataset. For GAP, we used  $k=6$  and HMRF smoothing for illustration.

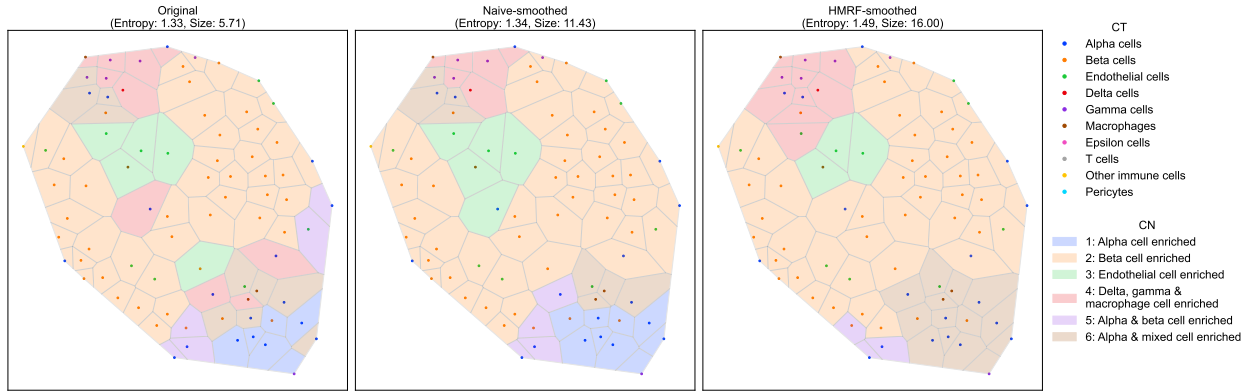

(a) CC

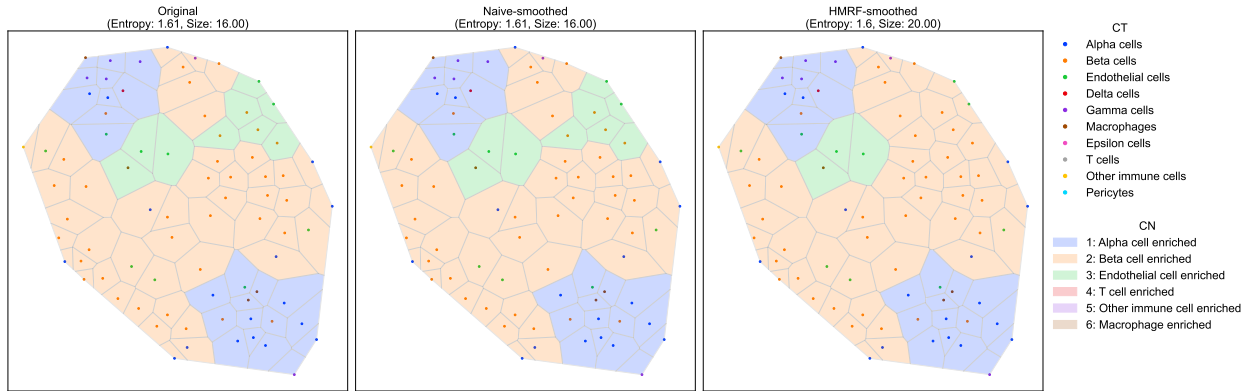

(b) CF-IDF

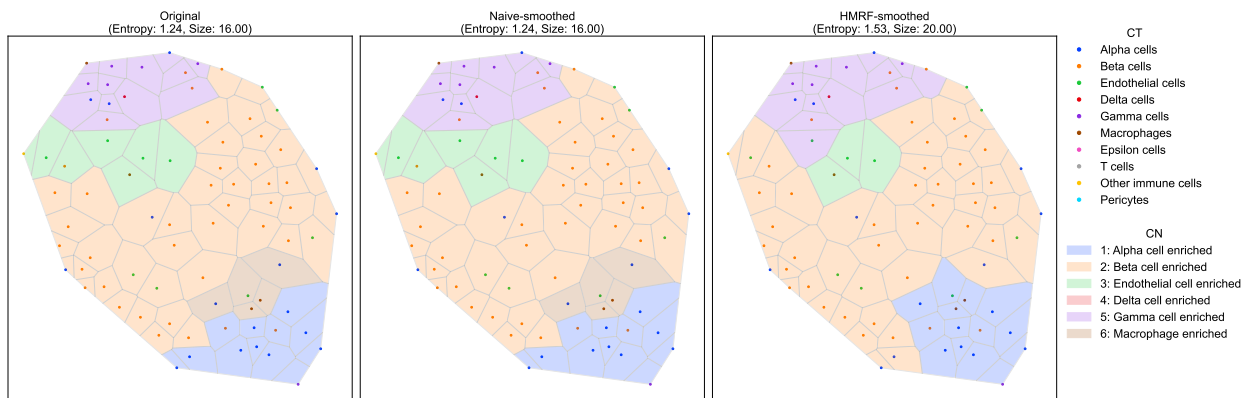

(c) CNE

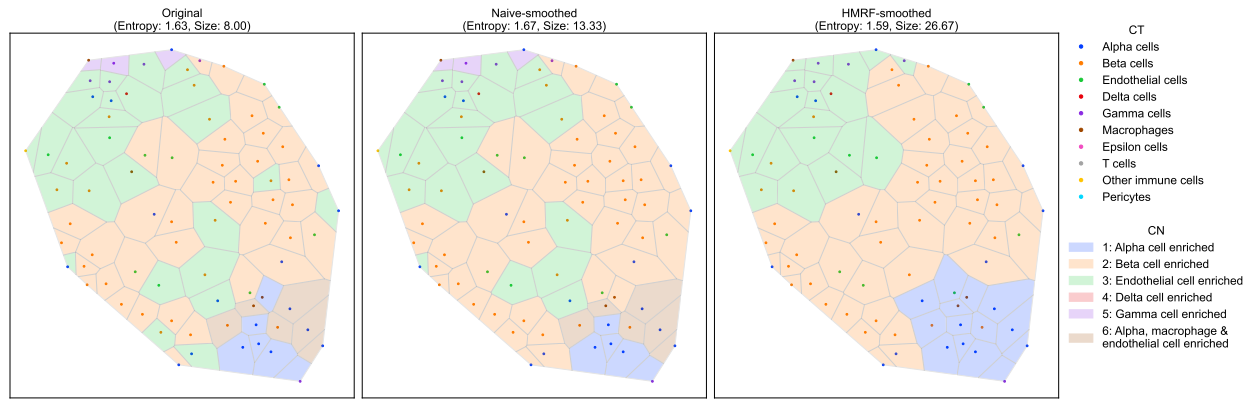

(d) Spatial LDA

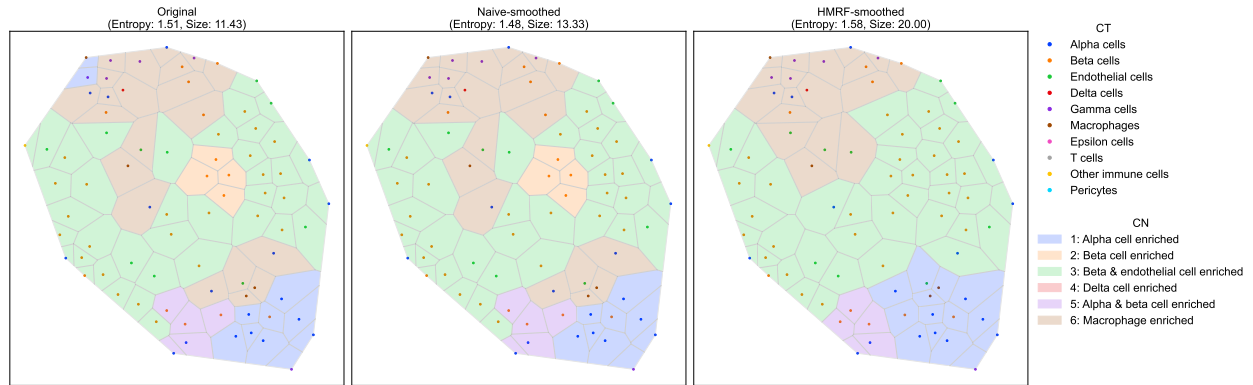

(e) ClusterNet

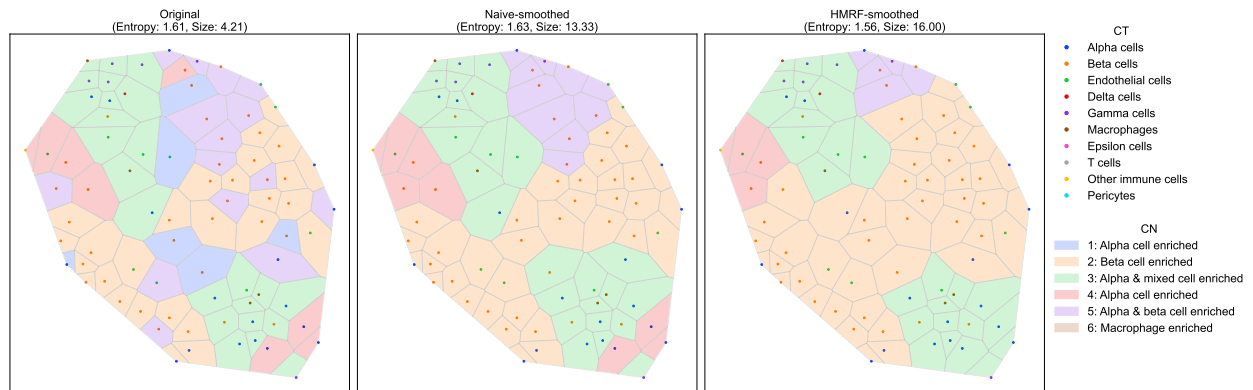

(f) GAP

Figure I: Voronoi diagrams showing the identified CNs of different methods on image **AGBA390\_4** of the T2D dataset. For GAP, we used  $k=6$  and HMRF smoothing for illustration..



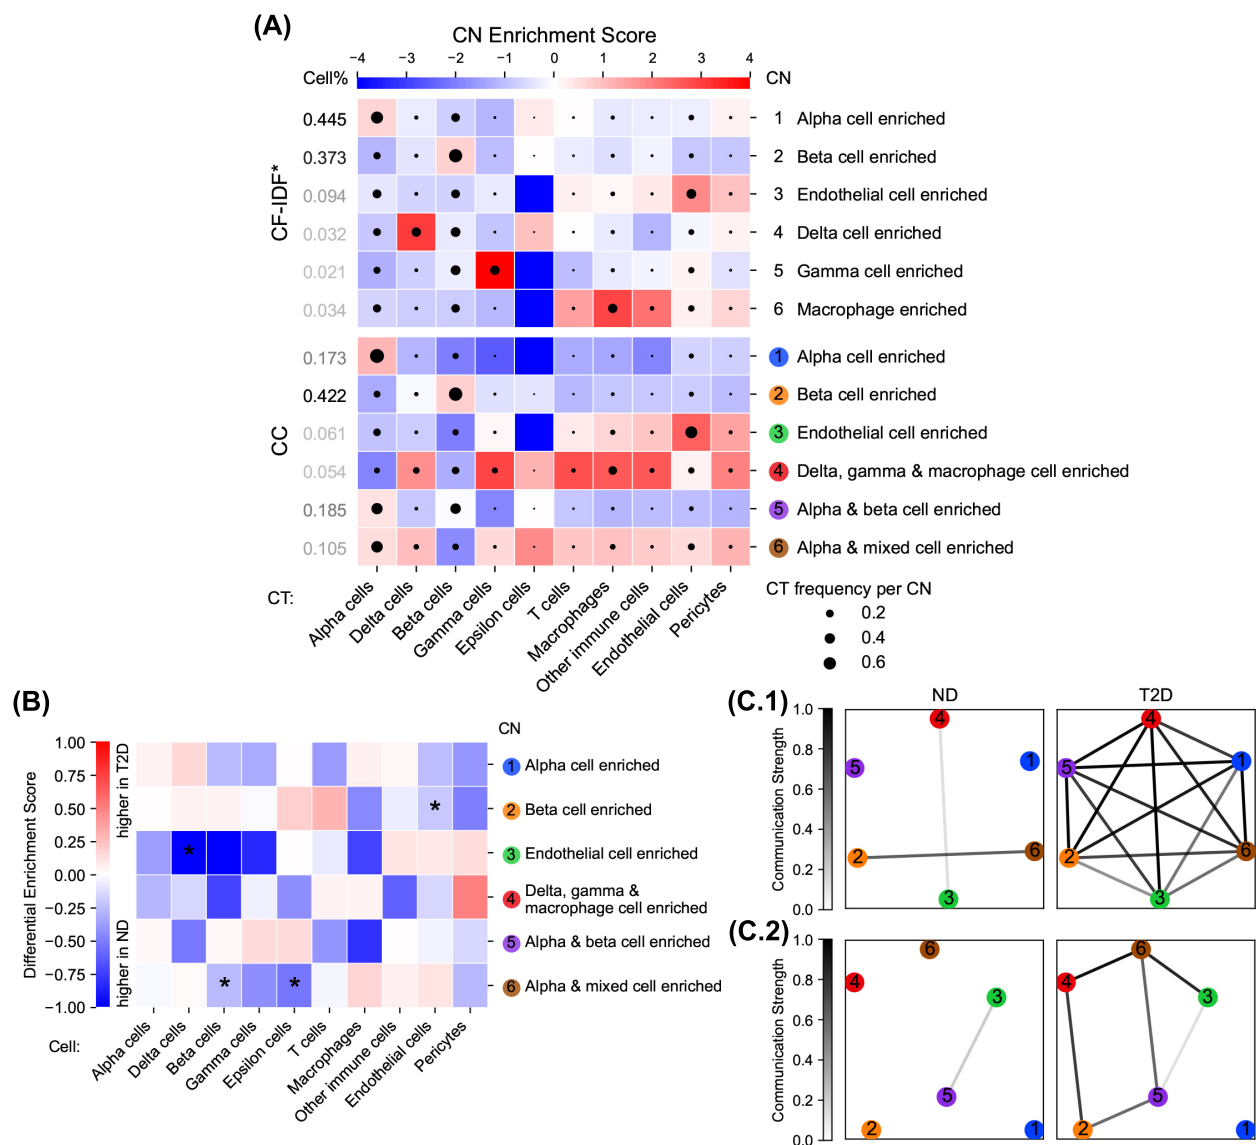

Figure J: CN analysis results of CC on the T2D dataset. (A) CT Enrichment analysis. (B) Differential CT Enrichment analysis. (C.1) Inter-CN Communication Network analysis involving vascular cells (endothelial cells and pericytes). (C.2) Inter-CN Communication Network analysis involving immune cells (T cells, macrophages, and other immune cells).

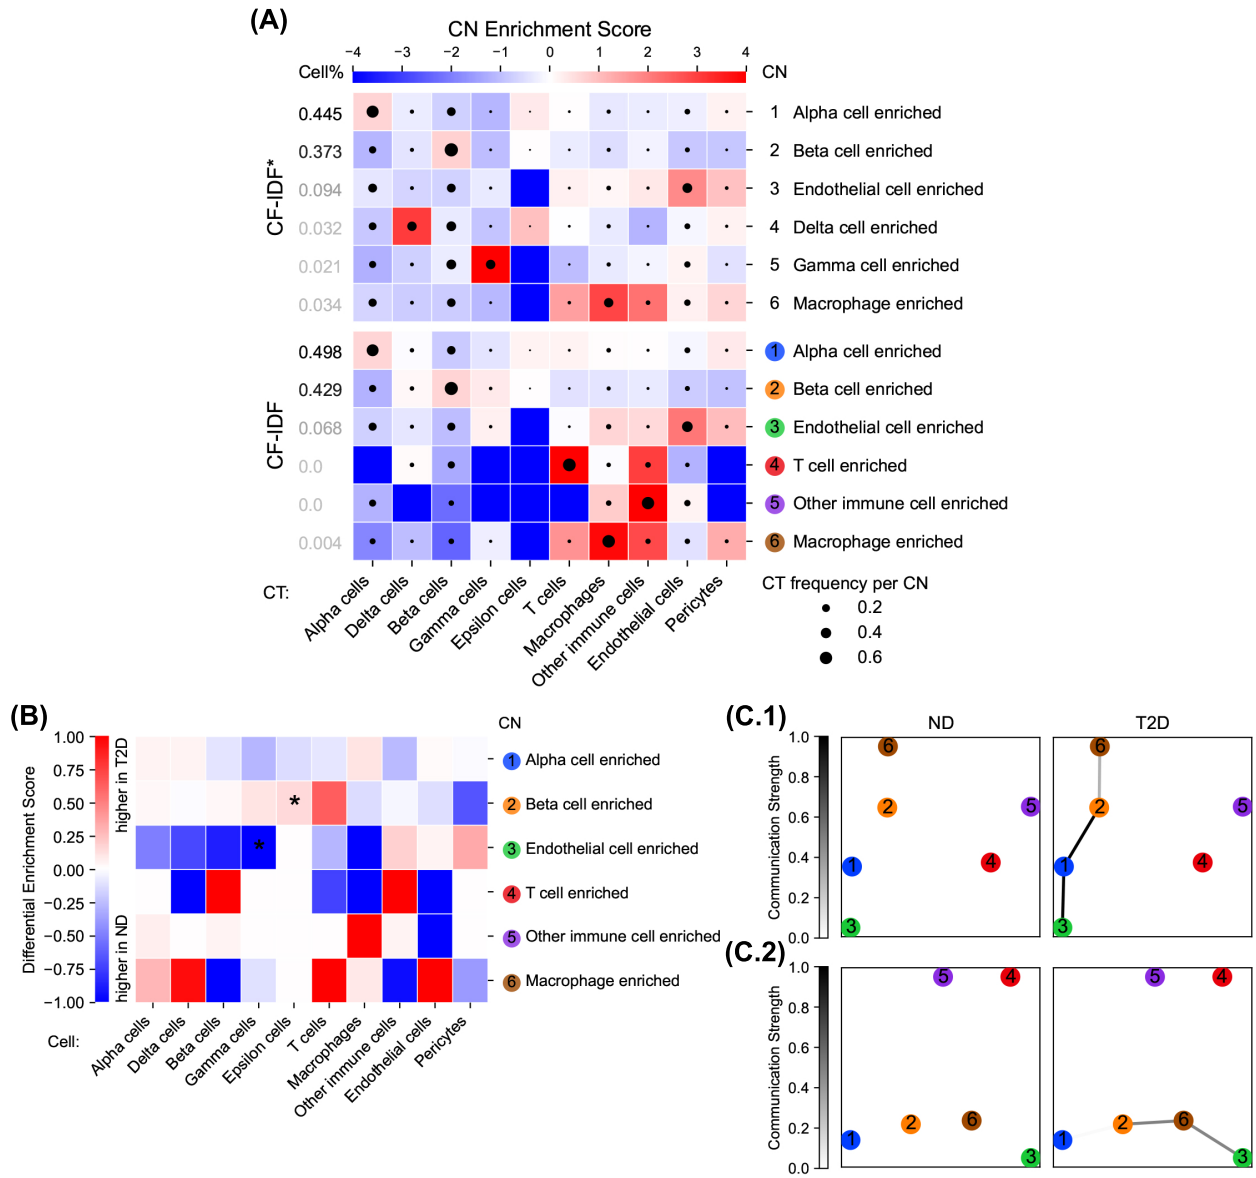

Figure K: CN analysis results of CF-IDF on the T2D dataset. (A) CT Enrichment analysis. (B) Differential CT Enrichment analysis. (C.1) Inter-CN Communication Network analysis involving vascular cells (endothelial cells and pericytes). (C.2) Inter-CN Communication Network analysis involving immune cells (T cells, macrophages, and other immune cells).

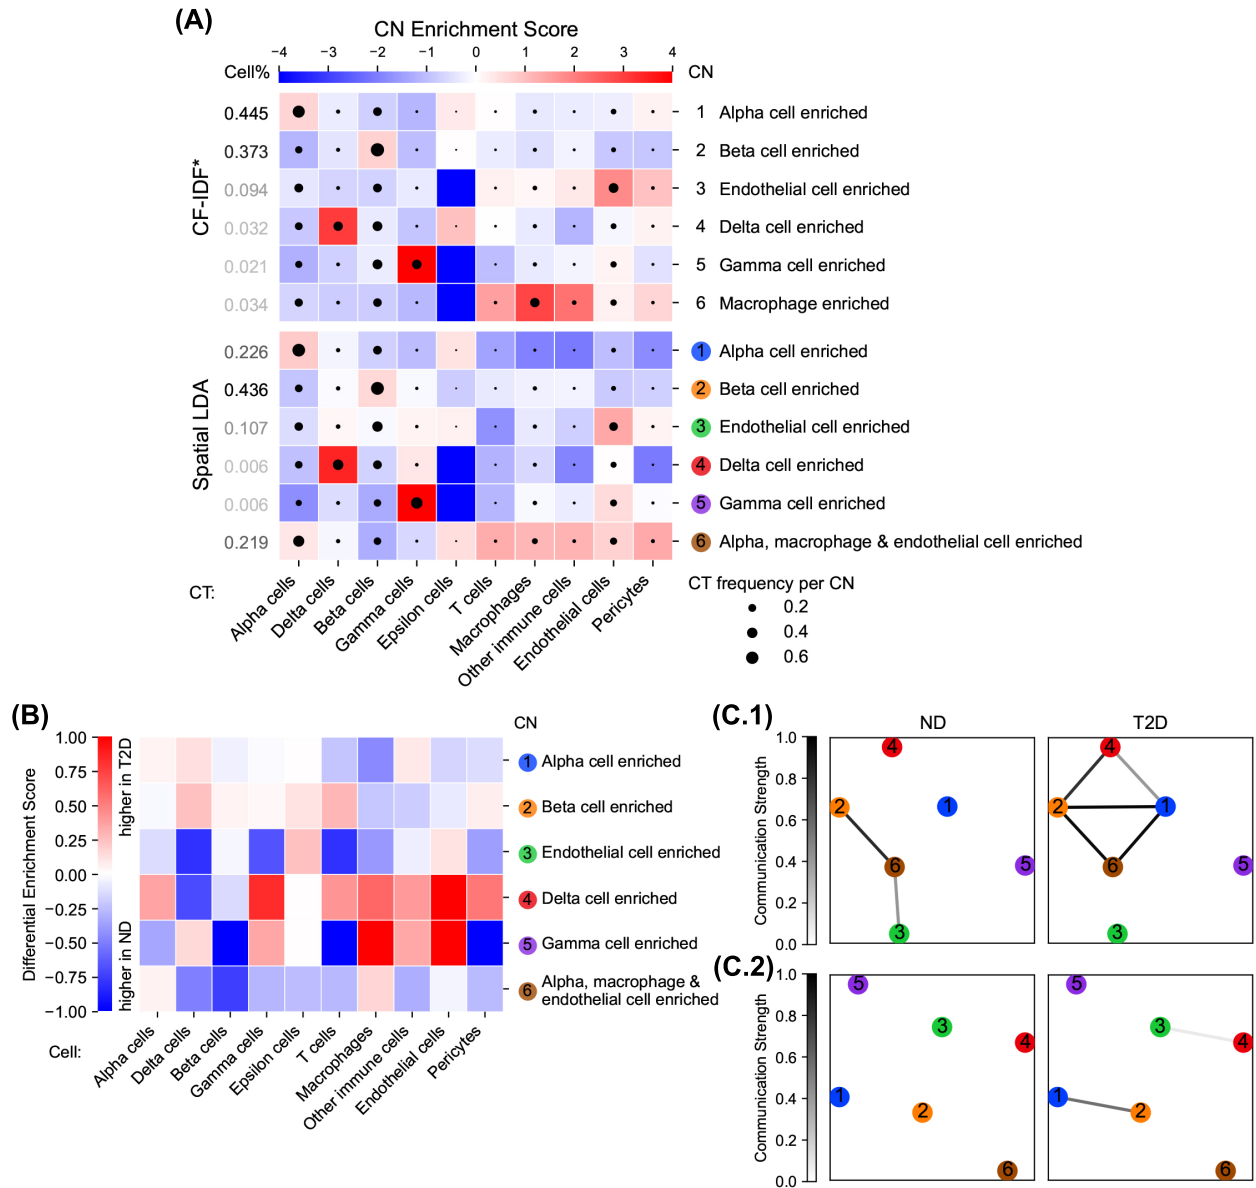

Figure L: CN analysis results of Spatial LDA on the T2D dataset. (A) CT Enrichment analysis. (B) Differential CT Enrichment analysis. (C.1) Inter-CN Communication Network analysis involving vascular cells (endothelial cells and pericytes). (C.2) Inter-CN Communication Network analysis involving immune cells (T cells, macrophages, and other immune cells).

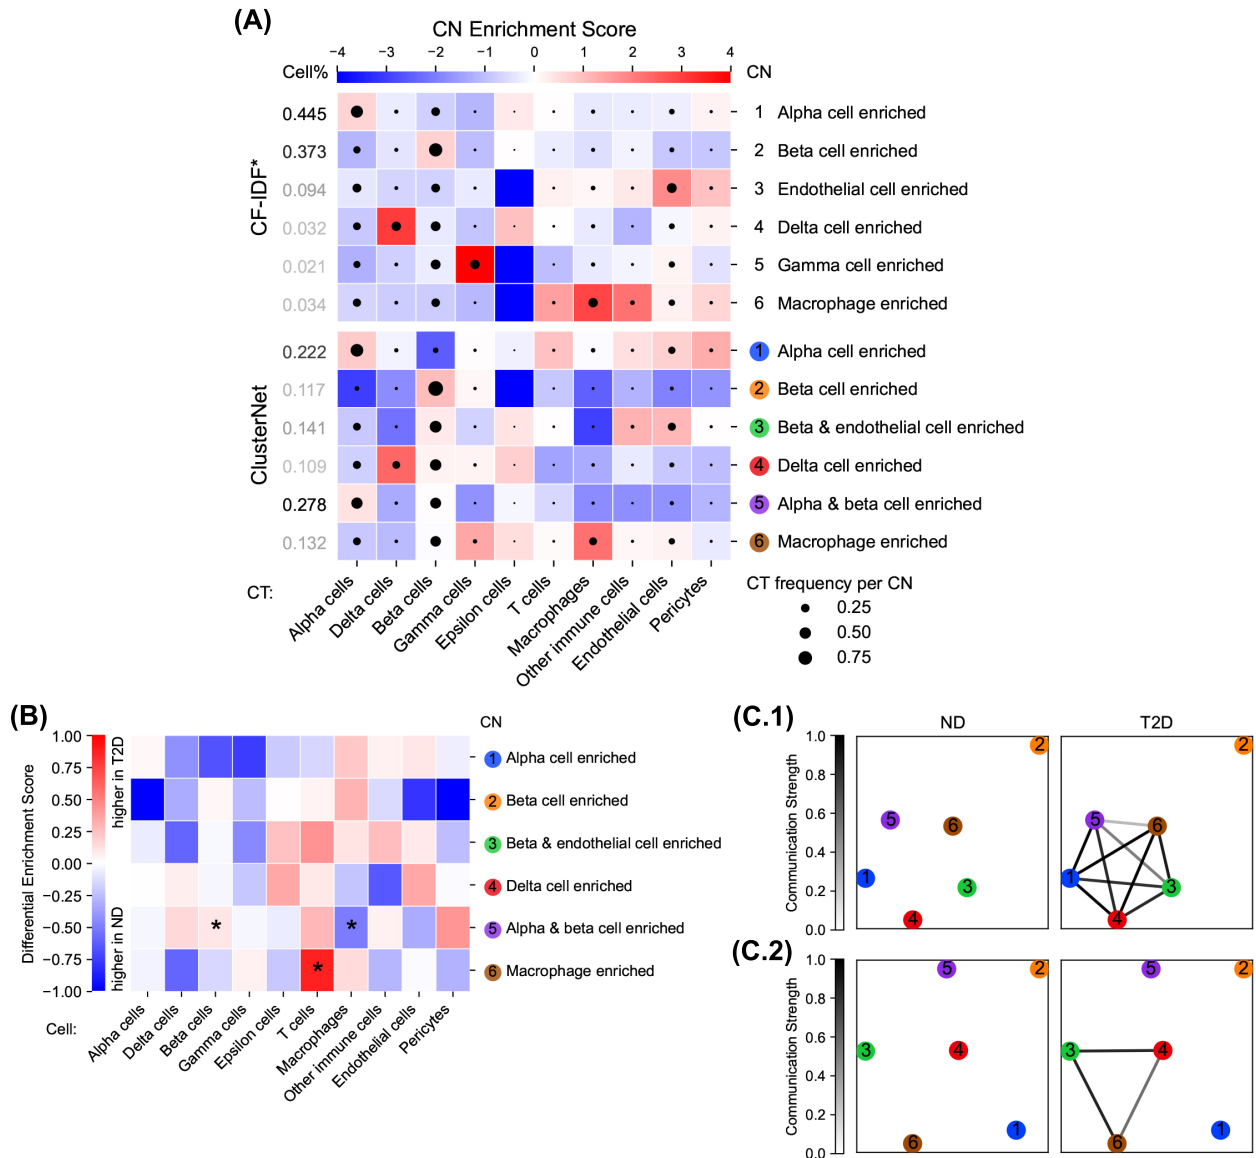

Figure M: CN analysis results of ClusterNet on the T2D dataset. (A) CT Enrichment analysis. (B) Differential CT Enrichment analysis. (C.1) Inter-CN Communication Network analysis involving vascular cells (endothelial cells and pericytes). (C.2) Inter-CN Communication Network analysis involving immune cells (T cells, macrophages, and other immune cells).



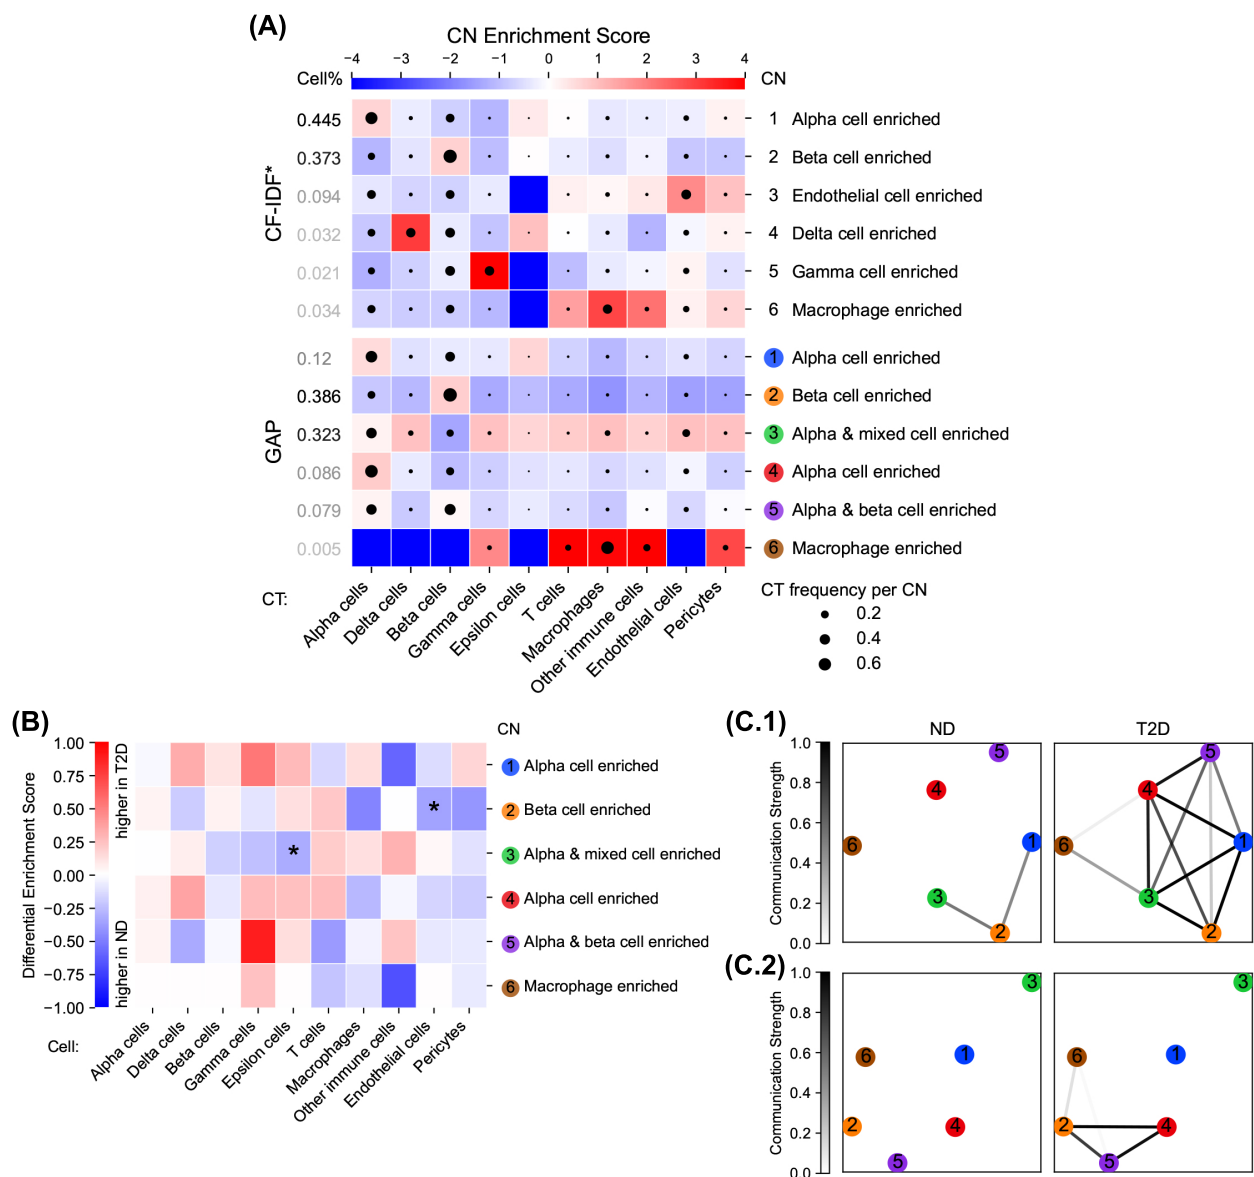

Figure N: **CN analysis results of GAP on the T2D dataset.** (A) CT Enrichment analysis. (B) Differential CT Enrichment analysis. (C.1) Inter-CN Communication Network analysis involving vascular cells (endothelial cells and pericytes). (C.2) Inter-CN Communication Network analysis involving immune cells (T cells, macrophages, and other immune cells).

## Supporting figures for the HLT dataset

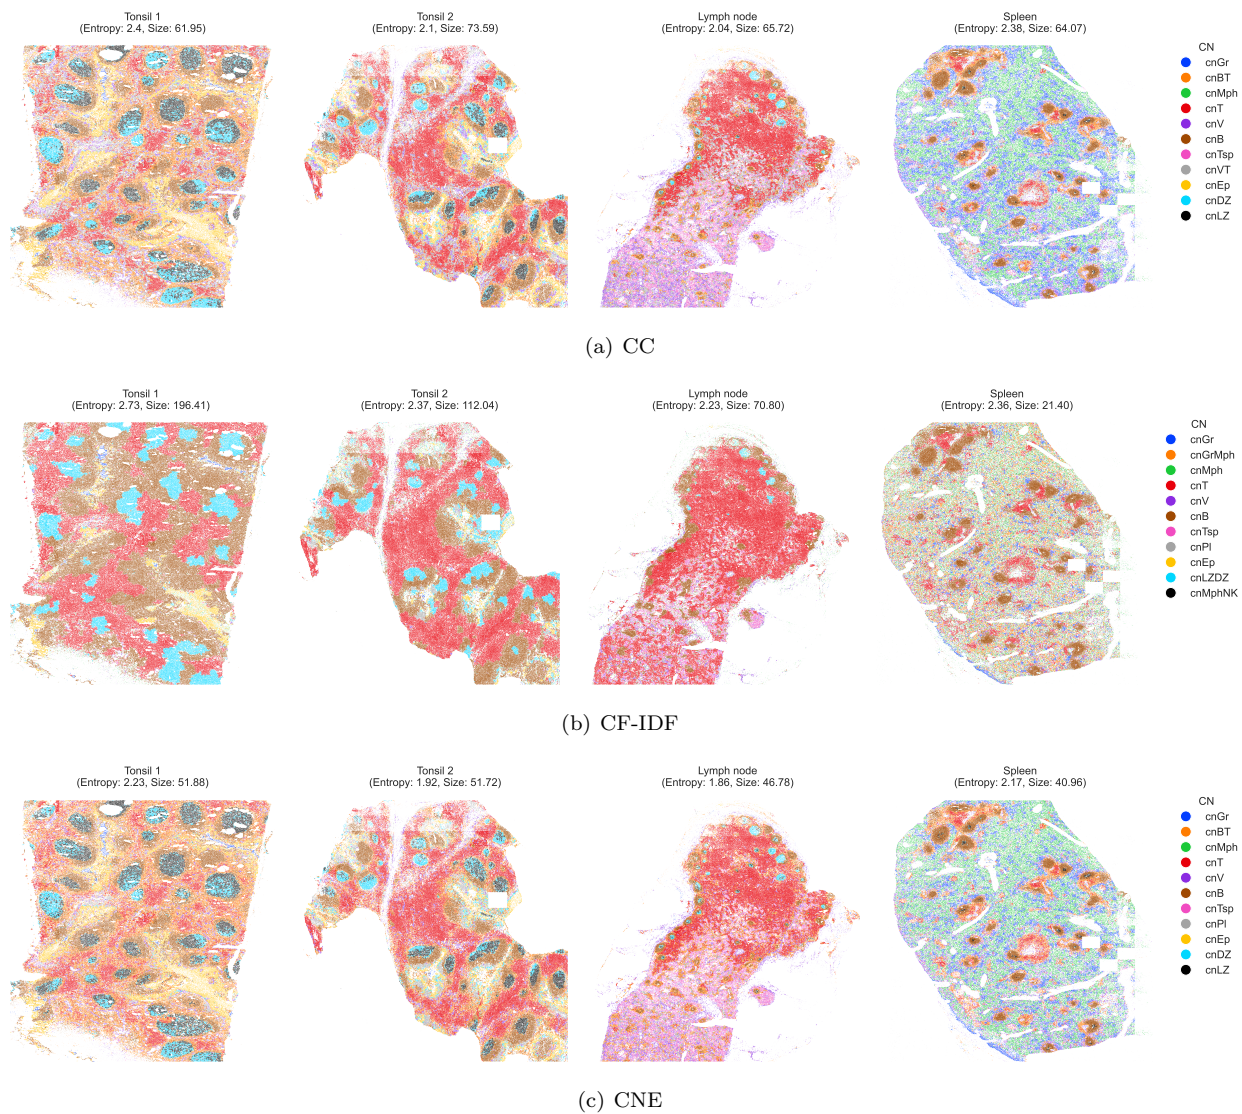

Figure O: Visualization of the identified CNs of different methods on the HLT dataset.

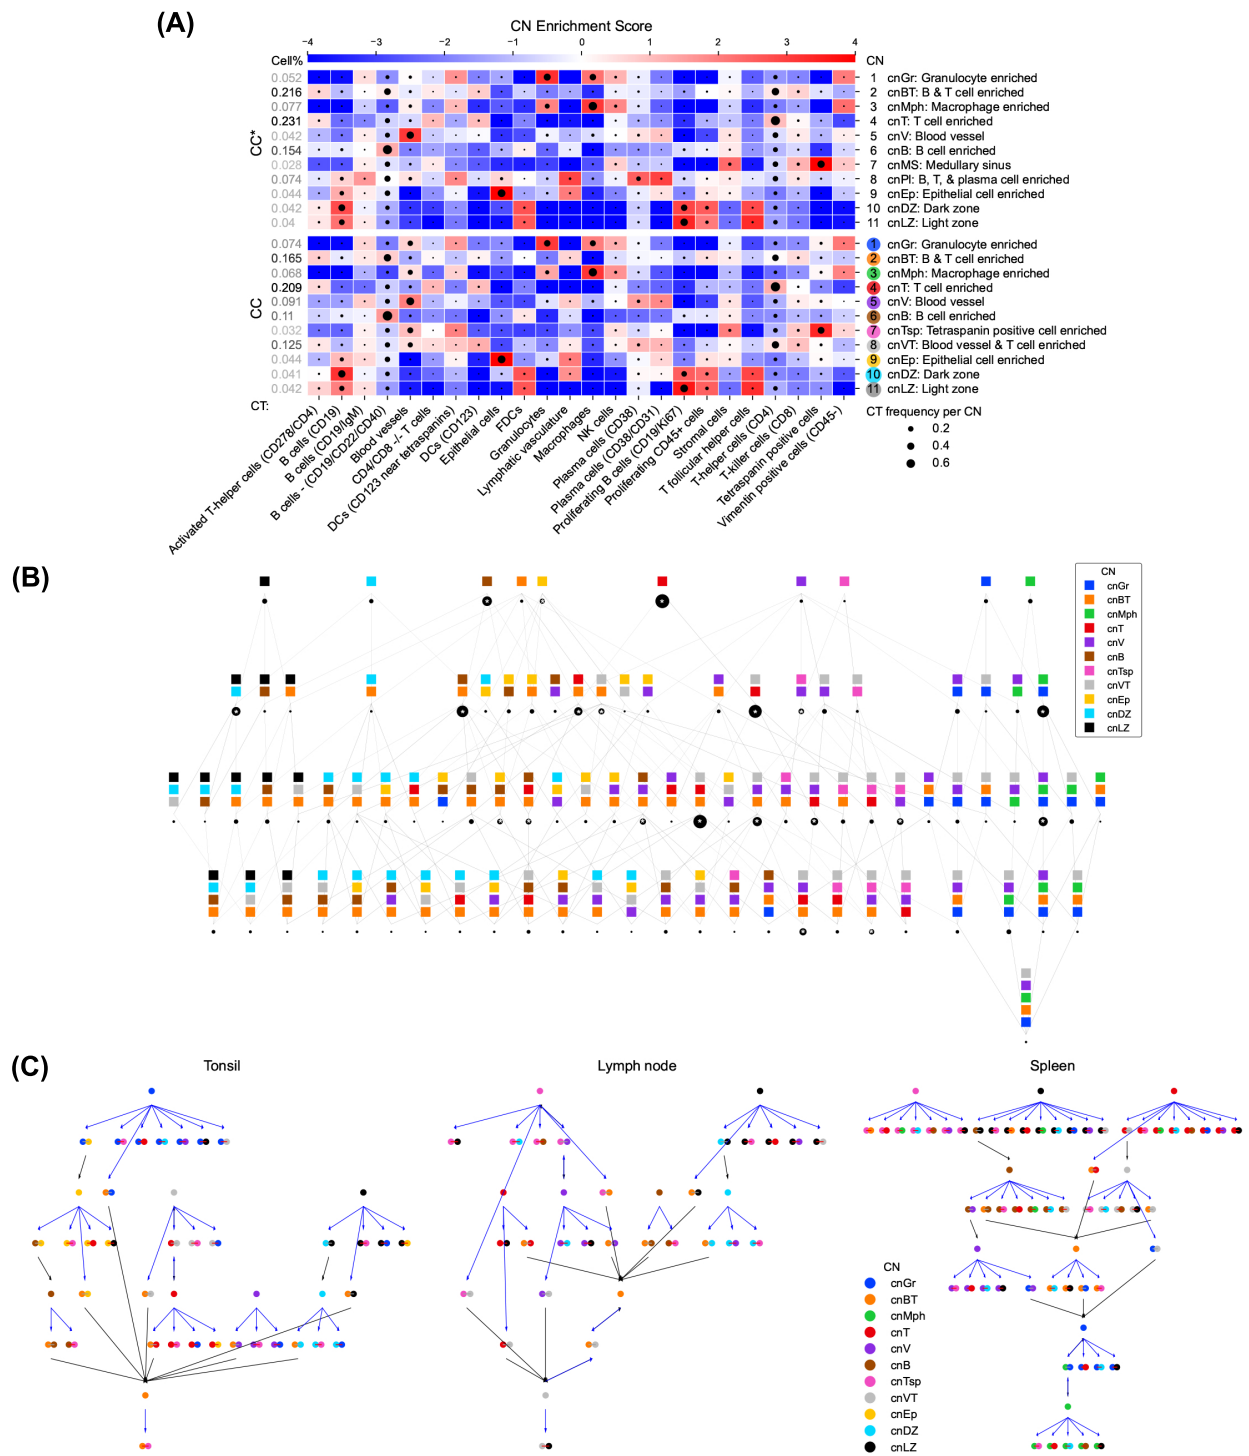

Figure P: CN analysis results of CC on the HLT dataset. (A) CN Combination Map analysis. (B) Assembly Rule Identification analysis.

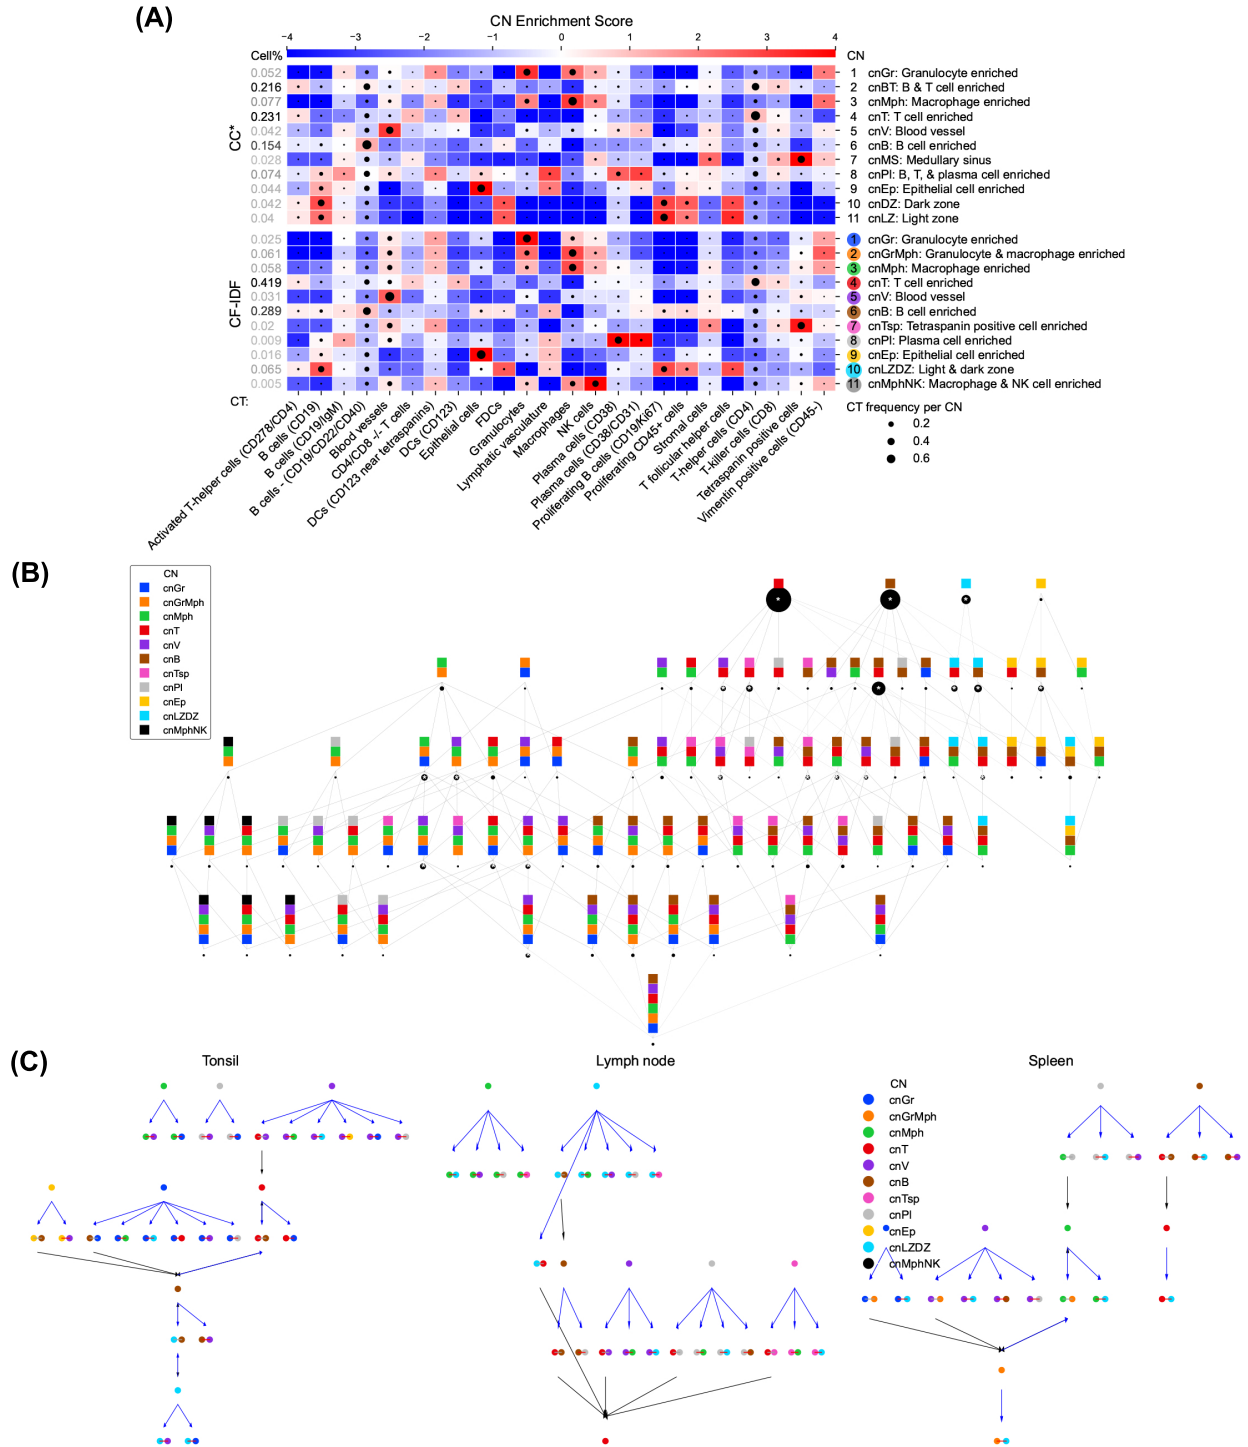

Figure Q: CN analysis results of CF-IDF on the HLT dataset. (A) CN Combination Map analysis. (B) Assembly Rule Identification analysis.



# Sensitivity analysis of CNE on the CRC dataset

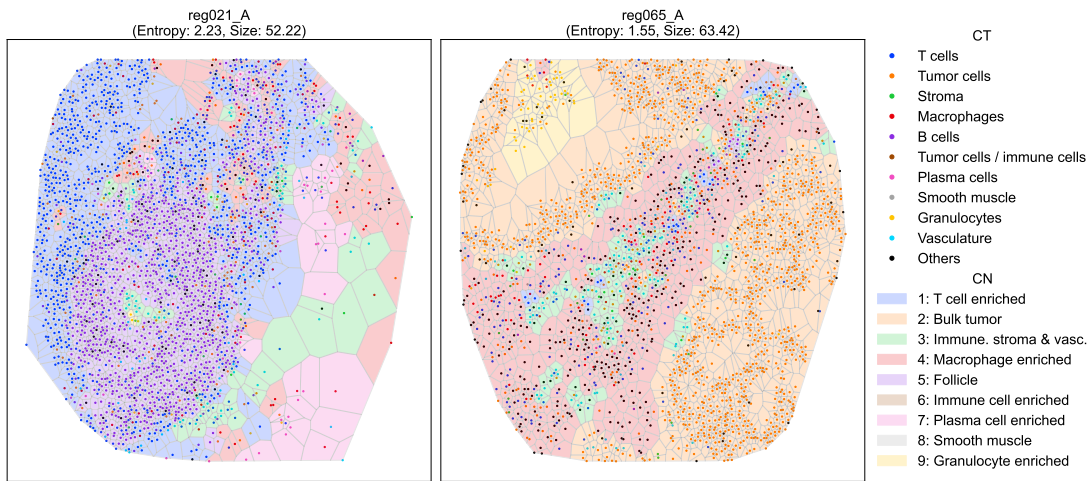

(a) CNE ( $perp = 10$ )

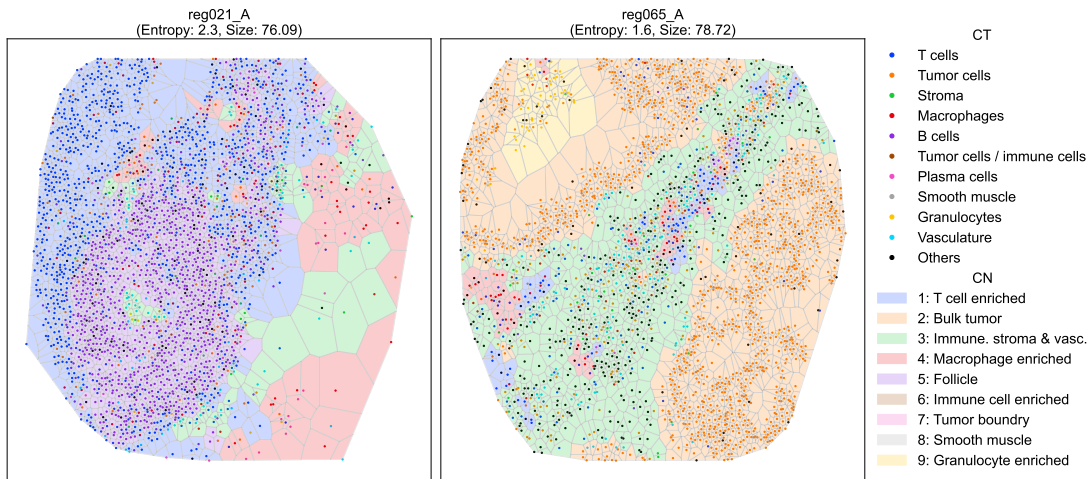

(b) CNE ( $perp = 12.5$ )

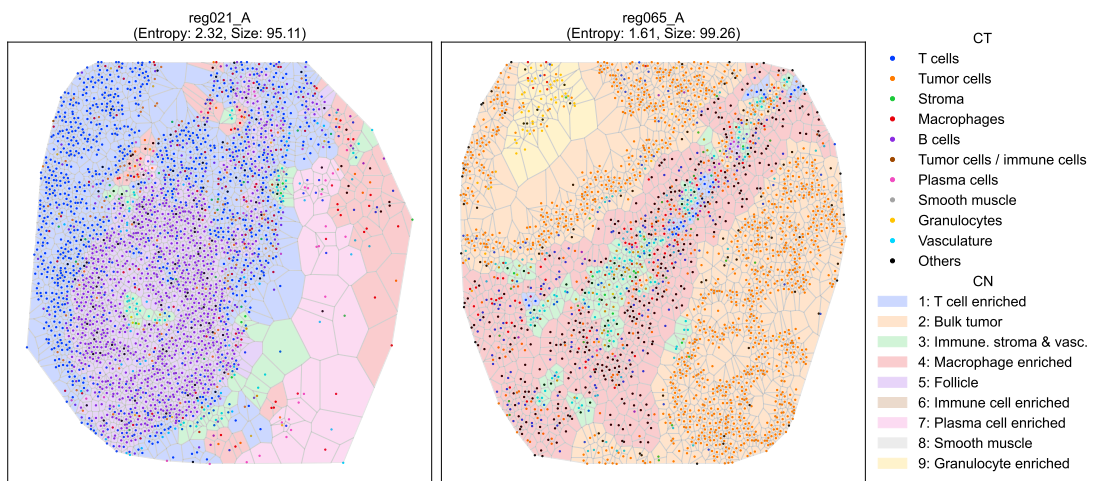

(c) CNE ( $perp = 15$ )



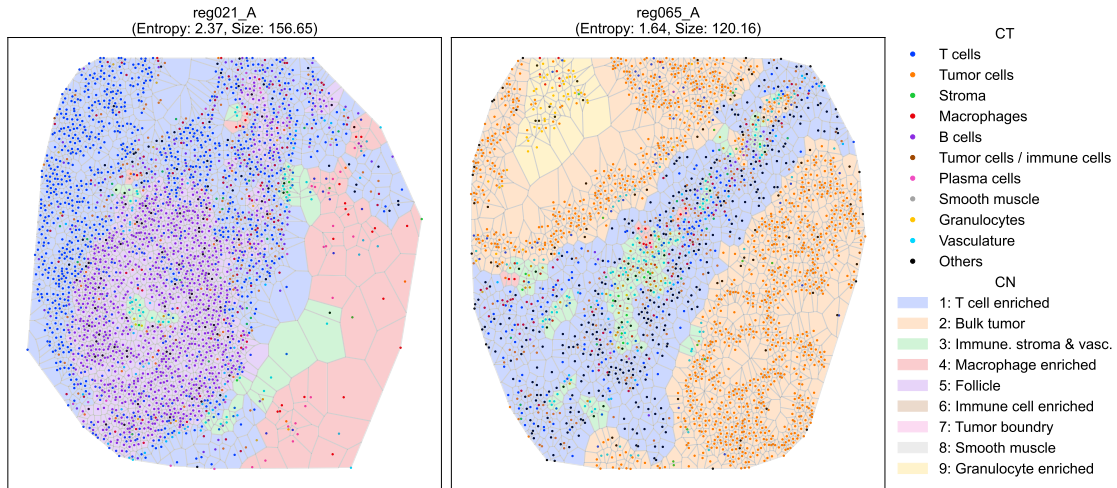

(d) CNE ( $perp = 17.5$ )

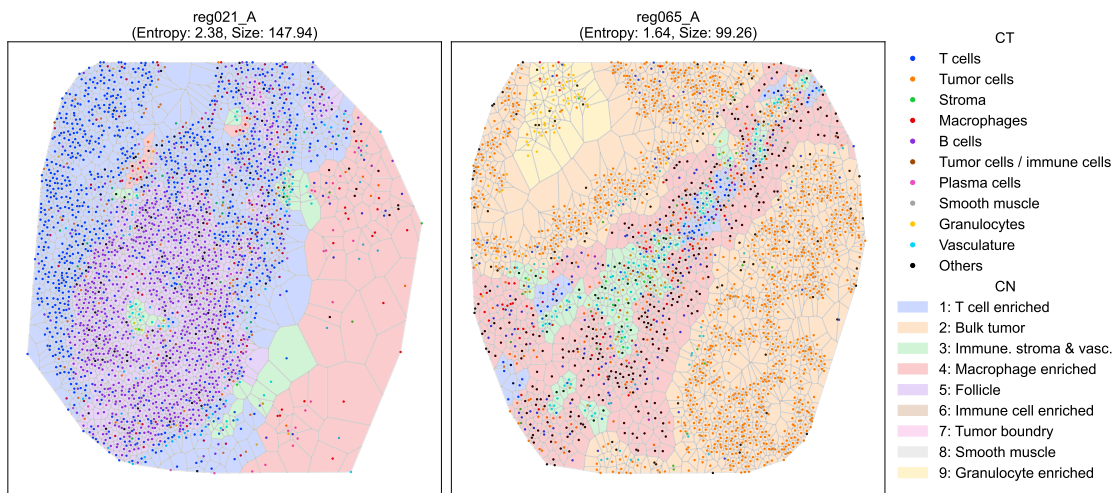

(e) CNE ( $perp = 20$ )

Figure R: Voronoi diagrams showing the identified CNs of CNE on images of the CRC dataset, with hyperparameter  $perp$  varying in  $[10, 12.5, 15, 17.5, 20]$ . The diagrams with  $perp \in \{10, 15, 20\}$  were similar, while for  $perp \in \{12.5, 17.5\}$ , the diagrams differed from others mainly in the diagonal region of reg065\_A, which might be caused by its complex cell composition (mostly “Others” minor cell types).

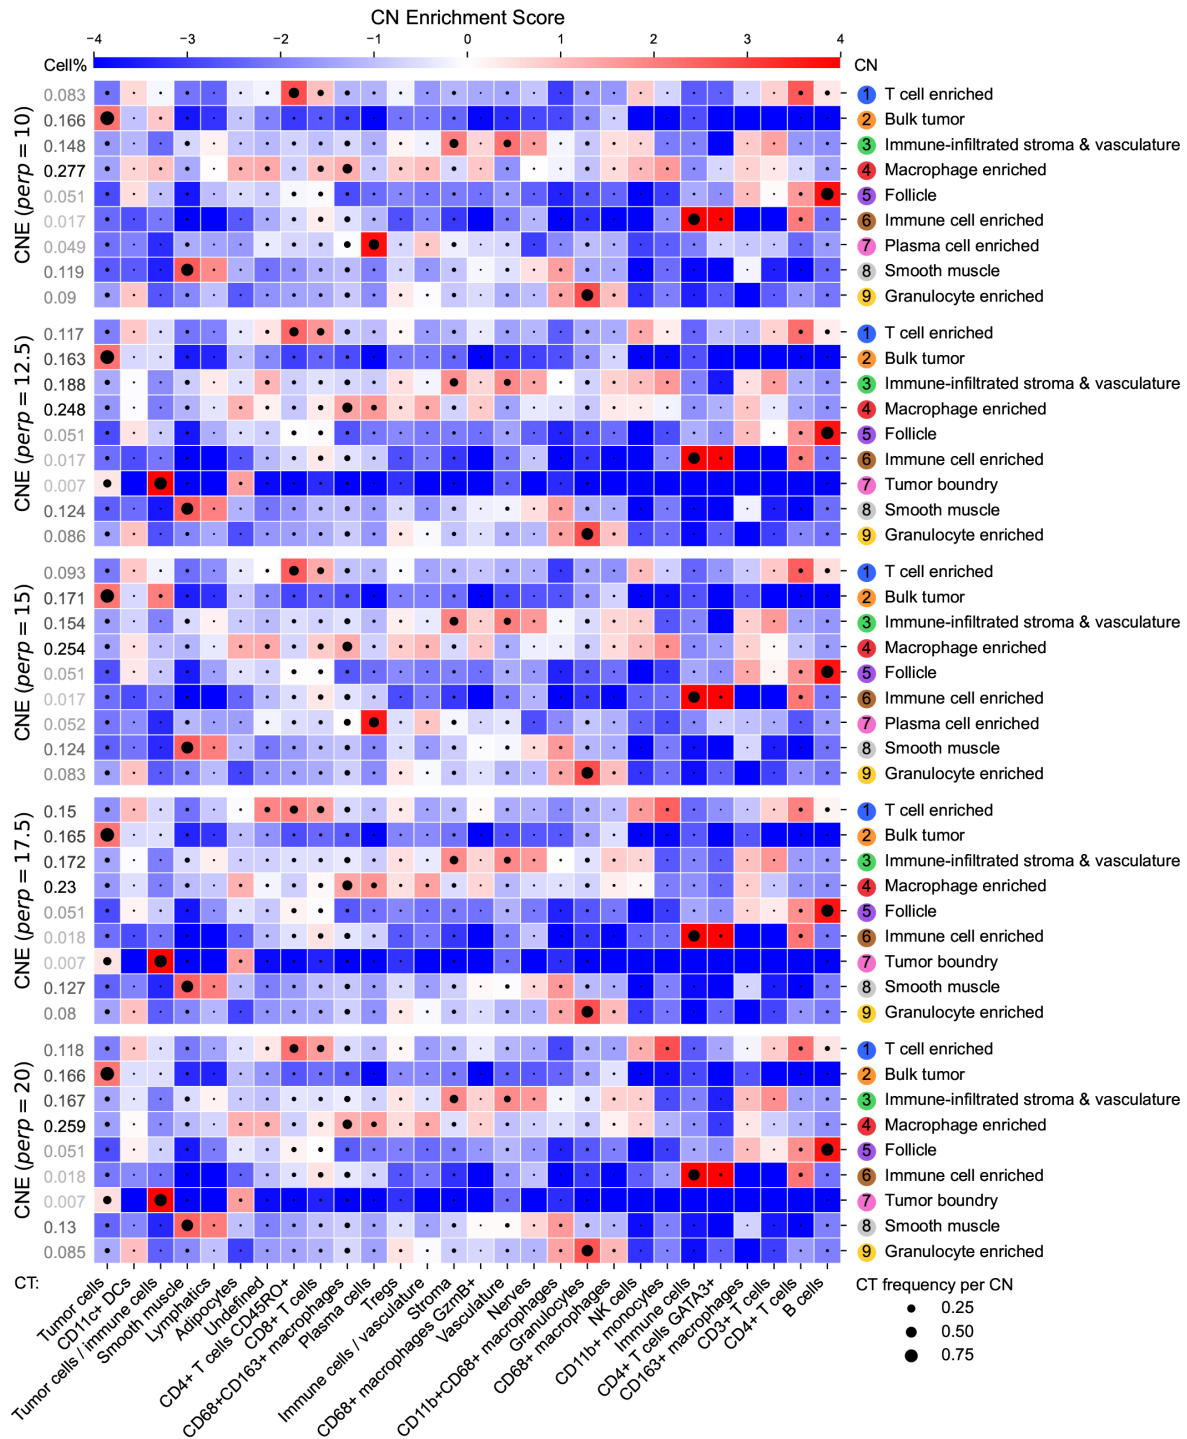

Figure S: CT Enrichment analysis for CNE on the CRC dataset, with hyperparameter *perp* varying in {10, 12.5, 15, 17.5, 20}. Eight of nine CNs agreed in CT compositions across different *perp*, with CN-7 varying between plasma cell enriched CN and tumor boundary CN.

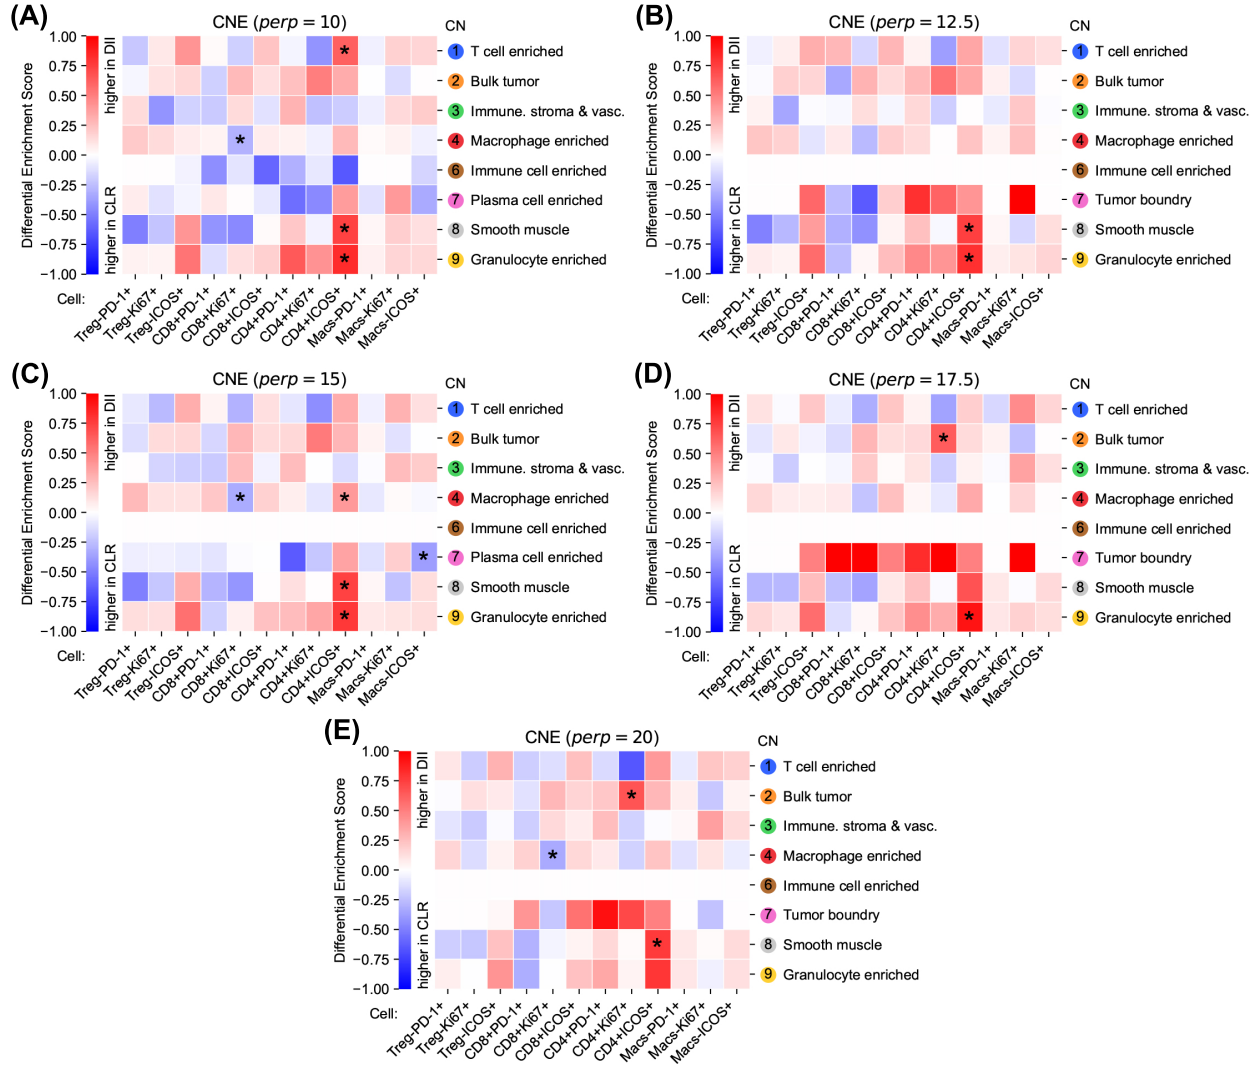

Figure T: **Differential CT Enrichment analysis for CNE on the CRC dataset, with hyperparameter  $perp$  varying in  $\{10, 12.5, 15, 17.5, 20\}$ .** Our findings of  $perp=15$  could be mostly recovered by other  $perp$  in the range. That is, (i) Ki-67+CD8+ T cells were more enriched in the T cell enriched CN in CLR donors, Ki-67+ Treg cells were more enriched in the macrophage enriched CN in DII donors (except  $perp=20$ ), and ICOS+ Treg cells were more enriched in the bulk tumor CN in DII donors (except  $perp=17.5$ ), showing that immunosuppressive activity is increased in macrophage enriched and bulk tumor CNs in DII donors, while in CLR donors cytotoxic activity is increased in the T cell enriched CN; (ii) PD-1+CD4+ T cells were more enriched in the granulocyte enriched CN in DII donors, showing its potential contribution to the antitumoral response.

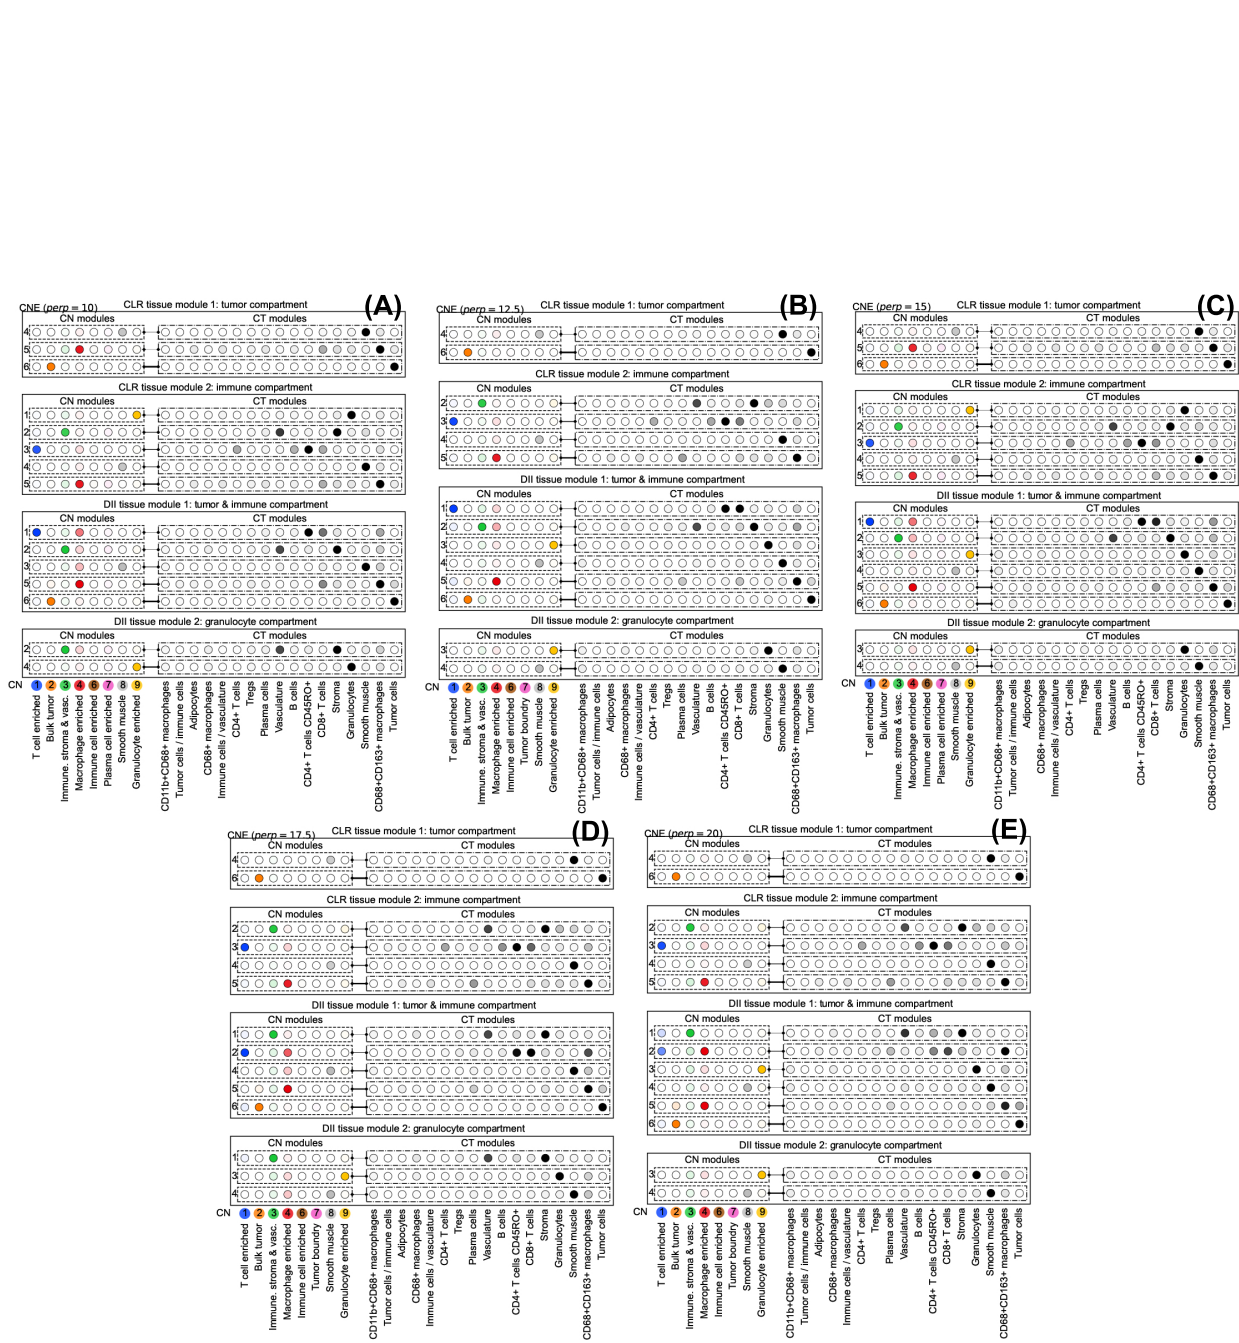

Figure U: **Tensor Decomposition analysis for CNE on the CRC dataset, with hyperparameter  $perp$  varying in  $\{10, 12.5, 15, 17.5, 20\}$ .** Our findings of  $perp=15$  could be mostly recovered by other  $perp$  in the range. That is, (i) there was a tumor compartment and an immune compartment as tissue modules in CLR donors, and a tumor & immune compartment and a granulocyte compartment as a tissue module in DII donors; (ii) there was a CN module with high weights for T cell and macrophage enriched CNs, whose corresponding CT module had high weights for T cells and macrophages, only in DII donors, which together showed that tumors in DII donors are more correlated to the immune processes with increased coupling between T cell and macrophage enriched CNs.



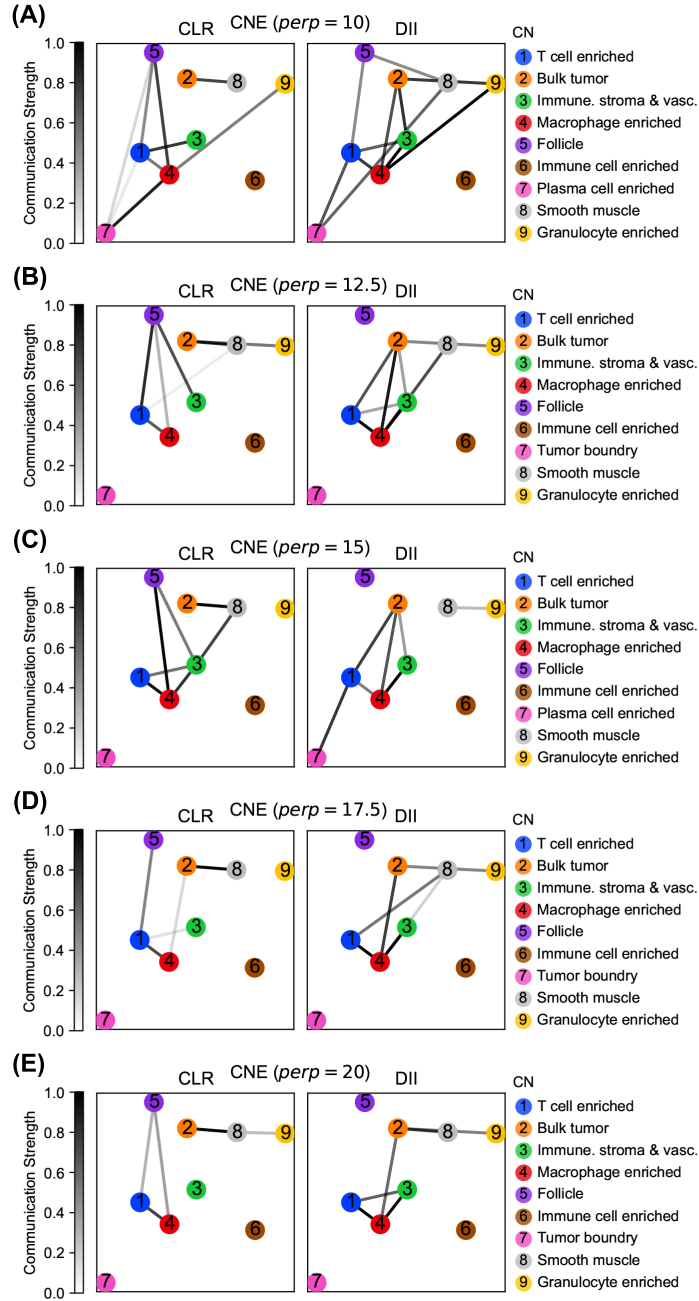

Figure V: Inter-CN Communication Network analysis involving  $\{PD1+, Ki-67+, ICOS+\}CD8+$  T cells and  $Ki-67+$  Tregs for CNE on the CRC dataset, with hyperparameter  $perp$  varying in  $\{10, 12.5, 15, 17.5, 20\}$ . The follicle CN was connected to immune CNs only in CLR donors (except  $perp=12.5$ ), and the tumor CN had stronger connection to the macrophage enriched CN in DII donors, which match our findings with hyperparameter  $perp=15$ . Still none of them could support the original conclusions that T cell and macrophage enriched CNs could communicate in functional T cells with the bulk tumor via the tumor boundary, and the communication between tumor boundary and bulk tumor CNs could be disrupted in DII donors.
